# Contribution of linear and nonlinear mechanisms to predictive motion estimation

Belle Liu<sup>1</sup>, Arthur Hong<sup>1,2</sup>, Fred Rieke<sup>1,4</sup>, and Michael B. Manookin<sup>3,4,\*</sup>

<sup>1</sup>Department of Physiology and Biophysics, University of Washington, Seattle, WA 98195

<sup>2</sup>Neuroscience Graduate Program, University of Washington, Seattle, WA 98195

<sup>3</sup>Department of Ophthalmology, University of Washington, Seattle, WA 98109

<sup>4</sup>Vision Science Center, University of Washington, Seattle, WA 98109

\*Corresponding author

---

**ABSTRACT.** Successful behavior relies on the ability to use information obtained from past experience to predict what is likely to occur in the future. A salient example of predictive encoding comes from the vertebrate retina, where neural circuits encode information that can be used to estimate the trajectory of a moving object. Predictive computations should be a general property of sensory systems, but the features needed to identify these computations across neural systems are not well understood. Here, we identify several properties of predictive computations in the primate retina that likely generalize across sensory systems. These features include calculating the derivative of incoming signals, sparse signal integration, and delayed response suppression. These findings provide a deeper understanding of how the brain carries out predictive computations and identify features that can be used to recognize these computations throughout the brain.

**Keywords:** predictive coding | motion estimation | dimensionality reduction | retina

**Correspondence:** [manookin@uw.edu](mailto:manookin@uw.edu)

---

## INTRODUCTION

1 Sensory regions of the brain provide a window to the  
2 outside world, allowing animals to infer information  
3 about the external environment and, ultimately, to in-  
4 teract with that environment. A central tenet of sensory  
5 neuroscience, the notion of feature selectivity, states  
6 that neuronal responses depend on a relatively small  
7 number of features present in the incoming stimulus  
8 (Fairhall et al., 2006; Sharpee et al., 2004; Pillow and Si-  
9 moncelli, 2006; Barlow et al., 1964; Zhang et al., 2012;  
10 Hubel and Wiesel, 1959). Indeed, there is strong evi-  
11 dence that the brain has evolved the ability to efficiently  
12 encode incoming sensory inputs by matching neural re-

13 sponse properties to the structure of the natural envi-  
14 ronment and specifically those aspects of nature with  
15 the greatest behavioral relevance (Barlow, 1961; Rieke  
16 et al., 1995; Olshausen and Field, 1996; Lewicki, 2002;  
17 Machens et al., 2005; Laughlin, 1981; Fairhall et al., 2001;  
18 Reinagel, 2001; Machens et al., 2001; Vinje and Gallant,  
19 2002; Chacron et al., 2003; Escabí et al., 2003).

20 A strong version of this hypothesis further posits that  
21 the information most useful for guiding behavior is that  
22 information from the past that can be used to estimate  
23 future states of the environment—the predictive infor-  
24 mation (Bialek et al., 2001; Salisbury and Palmer, 2016;  
25 Tishby et al., 1999). Predictive encoding in sensory sys-

tems is currently best understood in the context of visual motion estimation, where retinal neurons use the past positions of a moving object to estimate its future trajectory (Berry *et al.*, 1999; Johnston and Lagnado, 2015; Leonardo and Meister, 2013; Palmer *et al.*, 2015; Schwartz *et al.*, 2007; Liu *et al.*, 2021). Predictive computations should also be present in other sensory systems (Sachdeva *et al.*, 2021; Bialek *et al.*, 2001; Salisbury and Palmer, 2016; Singer *et al.*, 2018; Chalk *et al.*, 2018). For example, an animal foraging for food must utilize the spatiotemporal patterns of odours in the environment to estimate the location of a food source (Vergasola *et al.*, 2007; Vickers, 2000; Koehl *et al.*, 2001; Zelano *et al.*, 2011). A deeper mechanistic understanding of predictive computations is needed to identify these computations across neural systems.

Here, we combine neural recordings, dimensionality reduction techniques, and neural circuit modeling to identify neural signatures of predictive encoding. We demonstrate that four cell types in the primate retina that show efficient predictive encoding share a common set of low-dimensional features that govern their light responses. These features include both linear and nonlinear properties. Several of these features, including the calculation of temporal derivatives, sparse signal integration, and delayed suppression of the neural response, are signatures of predictive encoding that may generalize across sensory systems.

## RESULTS

### Common features of retinal receptive fields

We studied how both linear and nonlinear properties of the spatiotemporal receptive field contribute to motion encoding in On- and Off-type parasol and smooth monostratified ganglion cells in the macaque monkey retina. We focused on these cells because they provide input to brain regions that contribute to motion processing in primates and they efficiently encode predictive motion information (Rodieck and Watanabe, 1993; Crook *et al.*, 2008; Schiller *et al.*, 1990; Billington *et al.*, 2011; Liu *et al.*, 2021). To estimate their receptive-field

properties, we recorded spike responses in these cells to a spatiotemporal noise stimulus consisting of adjacent bars presented over the receptive field center and surround regions (grid size,  $19 \times 1$ ; bar width,  $50 \mu\text{m}$ ; height,  $730 \mu\text{m}$ ). The contrast of each bar was drawn from a Bernoulli distribution on each stimulus frame (contrast,  $\pm 50\%$ ; see Methods).

The stimulus set used included stimuli with spatiotemporal correlations and stimuli lacking net correlations (Liu *et al.*, 2021). However, the nature of the spatiotemporal correlations precluded the use of classical dimensionality reduction techniques. Maximally informative dimensions, an information-theoretic technique, does not suffer from this limitation and we utilized this method to estimate the spatiotemporal filtering properties of each cell (Sharpee *et al.*, 2004; Williamson *et al.*, 2015; Paninski, 2003). This technique calculates the set of spatiotemporal filters or kernels that best preserve information about the stimulus in a cell's spike outputs (Sharpee *et al.*, 2004; Williamson *et al.*, 2015; Pillow and Simoncelli, 2006; Paninski, 2003). The idea is that a single neuron is insensitive to most of the possible stimuli that can be generated; instead the neuron's limited stimulus selectivity can be described with a relatively small number of spatiotemporal kernels (**Figure 1**, **Figure S1**). These kernels form a simplified (low-dimensional) description of the spatiotemporal patterns that produce spiking in a cell and thus provide useful insights into the cell's encoding properties.

Our goal was to obtain a low-dimensional representation describing the relationship between the input stimulus and the spike output of each cell. However, the computational overhead of the maximally informative dimensions algorithm is very high, and we were limited to three spatiotemporal kernels in our receptive field estimation (Sharpee *et al.*, 2004; Williamson *et al.*, 2015). For each cell, we computed the three spatiotemporal kernels that preserved the greatest amount of information about the stimulus in the spike output of the cell. The kernels were ordered by their informativeness with the first/dominant kernel preserving the greatest infor-

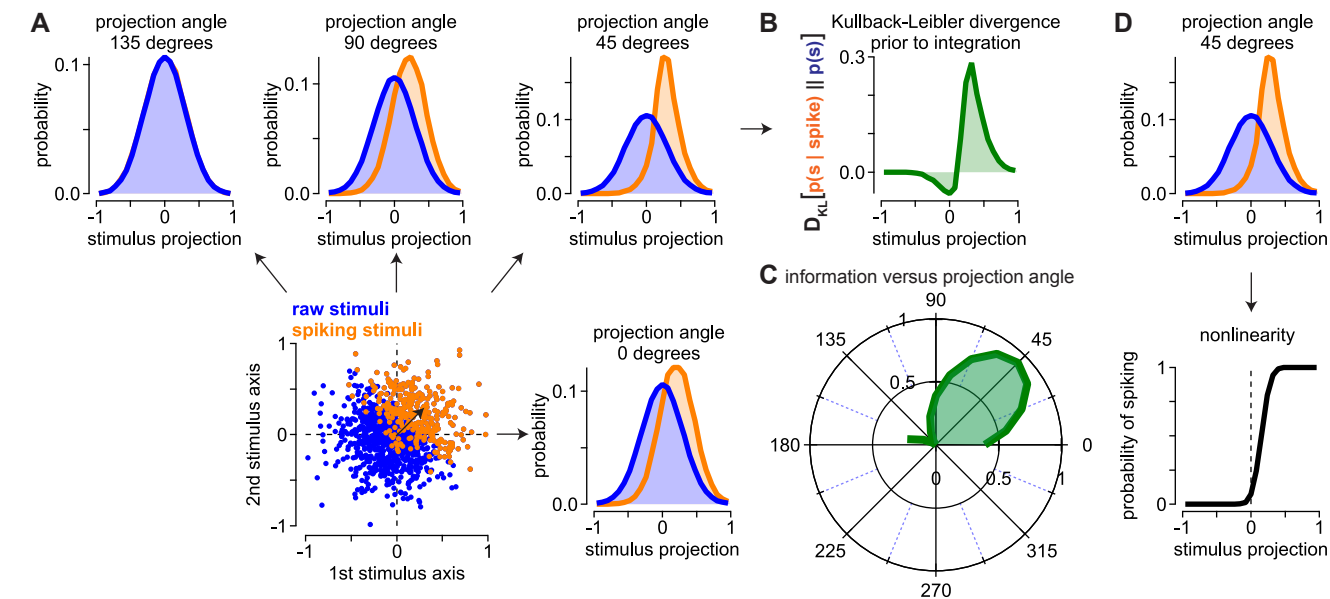

**Figure 1.** Example of the maximally informative dimensions technique for dimensionality reduction. (A) To illustrate the technique, we generated a hypothetical two-dimensional stimulus space with the blue dots indicating all of the raw stimuli and the orange dots indicating the subset of raw stimuli that elicited a spike. The probability distributions for the raw and spike-triggered stimuli are shown for four projection angles. The distributions showed the greatest separation at 45 degrees, which corresponds to the angle by which the data were artificially rotated. (B) The maximally informative dimensions technique seeks projections that maximize the information that a single spike conveys about the stimulus. This single-spike information is equivalent to the Kullback-Leibler divergence between the spike-triggered and raw stimulus distributions (*green*). Divergence values are shown for the 45 degree projection prior to integration. Integration produces a single value in bits spike<sup>-1</sup>. (C) Polar plot showing the single-spike information as a function of projection angle for the stimulus space in (A). Information peaked at 45 degrees. (D) The probability of observing a spike given a stimulus is equal to the ratio between the spike-triggered and raw stimulus distributions multiplied by the probability of observing a spike.

106 mation about the stimulus. These kernels showed con- 107  
 108 sistent spatial features across cells (**Figure 2**). The dom- 109  
 110 inant spatial kernels for all cell types were well approx- 111  
 112 imated by a Gaussian function. The dominant temporal 113  
 114 kernels were biphasic and peaked at a time lag of ap- 115  
 116 proximately 40 ms, consistent with previous measure- 117  
 118 ments from parasol and smooth monostriated gan- 119  
 120 glion cells (Rhoades et al., 2019; Pillow and Simoncelli, 2006; Chichilnisky and Kalmar, 2002).

115 One of the additional kernels showed a spatial profile 116  
 117 consistent with the first derivative of a Gaussian func- 118  
 119 tion with a positive-going lobe at negative  $x$ -values and 120  
 a negative-going lobe at positive  $x$ -values. This deriva-

121 other kernel typically occurred as the third kernel in 122  
 123 Off-type cells and the second kernel in On-type cells 124  
 125 (**Figure 2B**). The temporal kinetics of this kernel were 126  
 127 delayed relative to the other two kernels. This delay 128  
 was approximately 20 milliseconds relative to the first 129  
 kernel (time-to-peak re to first kernel,  $-22.4 \pm 3.0$  ms;  $n$  130  
 = 78 cells;  $p = 9.8 \times 10^{-10}$ , Wilcoxon signed rank test). 131

### 128 Receptive field kernels share a common nonlinearity 129

129 The dimensionality reduction technique that we used 130  
 131 to estimate the spatiotemporal kernels assumes that 132  
 133 outputs of these kernels are summed prior to passing 134  
 through a common nonlinearity (Sharpee et al., 2004; 135  
 Williamson et al., 2015). We tested this by comparing 136  
 the shapes of this shared nonlinearity with the non-

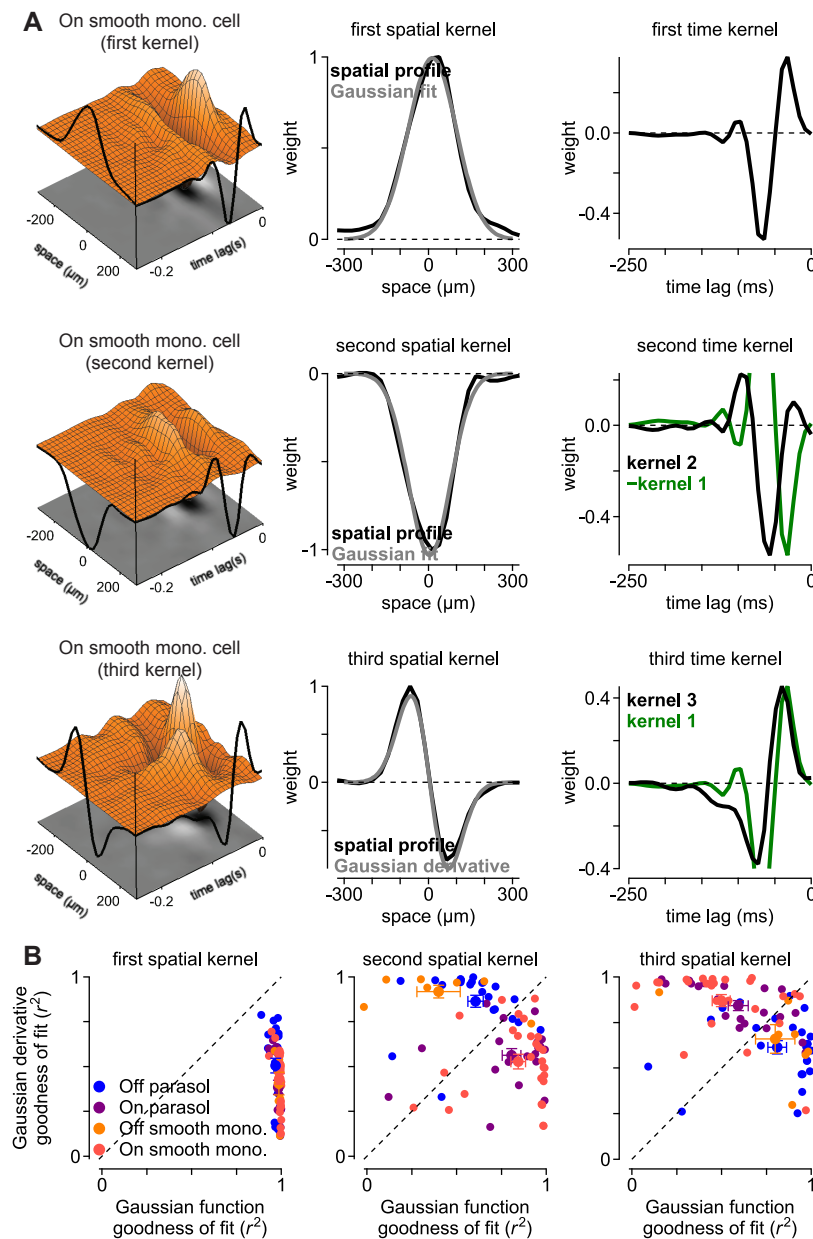

**Figure 2.** Primate ganglion cells show several significant receptive-field kernels. (A) Spatiotemporal kernels for On and Off smooth monostratified and parasol ganglion cells were determined using an information-theoretic analysis technique. The dominant kernel showed a classical Gaussian spatial profile (*top row*). The spatial profiles of the second (*middle row*) and third kernels (*bottom row*) extracted resembled the first and second derivatives of a Gaussian function, respectively. The scaled temporal component of the first kernel is shown with the second and third kernels to illustrate the differences in kinetics (*green*); the sign of the first kernel was inverted in the second row to match the sign of the second kernel. (B) Goodness-of-fit comparison ( $r^2$ ) for a Gaussian function versus the first derivative of a Gaussian. The comparison is shown for the first three spatial kernels. Circles and error bars indicate mean  $\pm$  SEM.



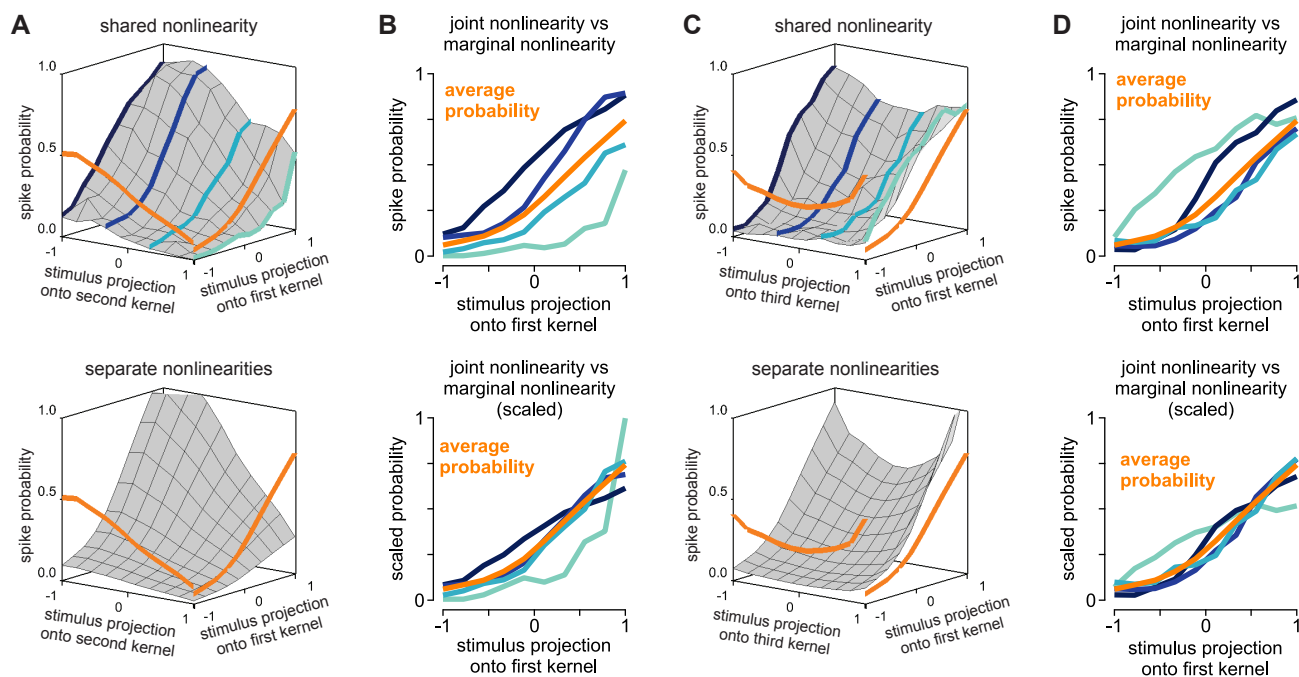

**Figure 3.** Receptive-field kernels share a common nonlinearity. (A) Two-dimensional nonlinearities illustrating the interactions between the individual kernels for an On smooth monostratified cell. The  $x$  and  $y$  axes represent the normalized projection of the stimulus onto the individual kernels. The  $z$ -axis represents the probability that the cell fired at least one spike. The average spike probabilities for the kernels are shown in orange. The shared nonlinearity was determined by binning the projections and computing the cell’s probability of discharging a spike in each bin (*top*). The separable nonlinearity was calculated from the outer product of the average probability curves and normalizing such that the total spike probability matched that of the shared nonlinearity (*bottom*). (B) Sections through the shared nonlinearity in (A) shown relative to the average probability (*orange*). The sections were multiplied by a scale factor to match to the average probability (*bottom*). The relatively poor match to the average probability indicates that a significant portion of the kernel outputs are combined prior to passing through a shared nonlinearity. (C-D) Two dimensional nonlinearities, as in (A-B), showing interactions between the first and third kernels.

135 linearities computed for a model in which the output  
 136 of each kernel passed through a separate nonlinearity  
 137 prior to summation (**Figure 3**; see Methods).

138 These nonlinearities represent interactions between  
 139 the kernels in determining the cell’s spike output; both  
 140 forms of interaction can be captured by computing a  
 141 two-dimensional surface relating the kernel outputs to  
 142 the spike response. The  $x$ -axis and  $y$ -axis represent the  
 143 stimulus projections onto the two kernels being exam-  
 144 ined ( $\mathbf{k}_i^T \mathbf{s}$ ) and the vertical axis shows the spiking prob-  
 145 ability of the cell for those stimulus projections.

146 Comparing the two-dimensional nonlinearities illus-  
 147 trates whether the kernels have separate nonlinearities

or share a common nonlinearity. If the kernel outputs  
 pass through separate nonlinearities before being com-  
 bined, then the individual nonlinearities would provide  
 a satisfactory description of spiking behavior in the neu-  
 ron and the shared and separate nonlinearities would be  
 similar. However, if the kernels shared a common non-  
 linearity, the separately computed nonlinearity would  
 differ from the shared nonlinearity.

Indeed, these nonlinearities differed substantially in-  
 dicated that the outputs of the kernels were dominated  
 by a single, shared nonlinearity (**Figure 3**). For exam-  
 ple, if the kernel outputs passed through separate non-  
 linearities prior to being combined, sections through

161 a particular axis of the two-dimensional nonlinearity  
162 should be scaled versions of the average along that axis.  
163 However, this was not the case, indicating that a sig-  
164 nificant proportion of the kernels were combined prior  
165 to passing through a common nonlinearity (**Figure 3B**).  
166 Thus, these results indicate that the outputs of each of  
167 these kernels are combined before passing through a  
168 single, dominant nonlinearity (Turner et al., 2018).

### 169 **Receptive field modes improve predictive motion en-** 170 **coding**

171 Many dimensionality reduction techniques, including  
172 principal components analysis, are technically valid  
173 only when the stimulus contrasts are drawn from  
174 a Gaussian distribution. Information-theoretic tech-  
175 niques such as the maximally informative dimensions  
176 approach employed here do not suffer from this limita-  
177 tion and function properly with non-Gaussian stimuli  
178 containing correlations (Sharpee et al., 2004; Pillow and  
179 Simoncelli, 2006; Williamson et al., 2015). We confirmed  
180 this by recording an uncorrelated stimulus in which the  
181 bar contrasts were drawn from a Gaussian distribution;  
182 this stimulus was recorded along with our normal stim-  
183 ulus set in the same cell. We then calculated the kernel  
184 bases separately for three different stimulus-response  
185 sets using the maximally informative dimensions ap-  
186 proach: 1) the uncorrelated Gaussian stimulus, 2) the  
187 uncorrelated stimulus with bar contrasts drawn from  
188 a Bernoulli distribution, and 3) the stimulus set with  
189 spatiotemporal correlations included (**Figure 4**). Con-  
190 sistent with theoretical reports, the kernel bases were  
191 very similar for the three different stimulus conditions  
192 tested—each of the three kernels showed similar spa-  
193 tiotemporal structure across the conditions (Sharpee  
194 et al., 2004; Williamson et al., 2015).

195 The kernels computed by the maximally informative  
196 dimensions algorithm describe a low-dimensional re-  
197 gion of stimulus space in which a neuron shows sensi-  
198 tivity to changes in the stimulus features. To determine  
199 whether the kernel bases computed for different stimuli  
200 defined similar stimulus subspaces, we computed the

canonical angles between the kernel bases. An angle of 201  
zero degrees occurs when the bases reside on precisely 202  
the same subspace and an angle of 90 degrees corre- 203  
sponds to subspaces that are uncorrelated (that is, or- 204  
thogonal) with each other. The calculated angles be- 205  
tween the different kernel bases ranged between 7-14 206  
degrees, indicating that subspaces spanned by the ker- 207  
nel bases were similar but not identical (**Figure 4B**). 208

To determine whether these differences in the kernels 209  
translated to fundamental differences in predictive mo- 210  
tion encoding, we computed the time-lagged mutual 211  
information for the kernel bases and pairwise and di- 212  
verging motion correlations that elicited predictive en- 213  
coding in parasol and smooth monostriated ganglion 214  
cells (Liu et al., 2021). This technique measures the in- 215  
formation that the spike output of a cell contains about 216  
the stimulus at both past and future time lags [(Palmer 217  
et al., 2015); see Methods]. 218

The model output was determined by projecting the 219  
stimulus onto the kernel basis, summing the kernel out- 220  
puts, and passing the result through a one-dimensional 221  
nonlinearity. This nonlinearity was estimated directly 222  
by calculating the spike rate conditioned on the stim- 223  
ulus projection onto the kernel basis (see Methods; 224  
**Figure S1**). The resulting mutual information curves 225  
strongly overlapped for the computed kernels. The pre- 226  
dictive information was also similar for each computed 227  
set of kernels (**Figure 4C, shaded region**). This result in- 228  
dicates that the slight differences in the estimated ker- 229  
nels do not translate to large differences in predictive 230  
motion encoding. 231

The computed kernels formed a simplified descrip- 232  
tion (i.e., low-dimensional basis) of the spatiotemporal 233  
features that best explain the spike responses of these 234  
neurons. However, it was not clear whether the ad- 235  
ditional kernels would improve encoding of predictive 236  
motion information relative to the condition in which 237  
only the dominant kernel was used. To test this, we pro- 238  
jected the motion stimuli onto these kernels and passed 239  
the output through the one-dimensional nonlinearity 240  
(**Figure 5**). This process was repeated in each cell for 241

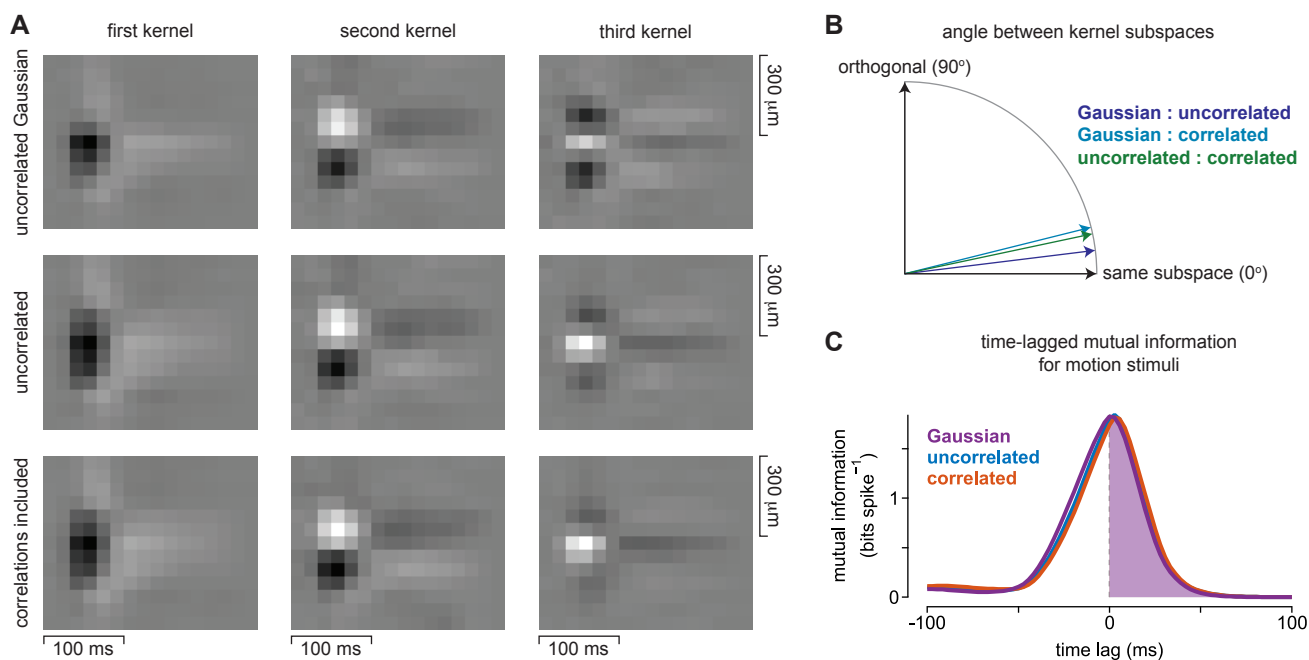

**Figure 4.** Kernel bases computed with different stimulus classes show similar structures and comparable predictive information encoding. (A) Spatiotemporal kernels in the same cell were estimated for an uncorrelated Gaussian stimulus (*top row*), an uncorrelated stimulus containing contrasts drawn from a Bernoulli distribution (*center row*), and with spatiotemporal correlations included (*bottom row*). The kernel bases computed by the maximally informative dimensions algorithm were similar for the different stimulus classes. (B) Computed angles between the subspaces spanned by the kernel bases in (A). A rotational angle of zero degrees would occur if the kernel bases spanned precisely the same subspace whereas an angle of 90 degrees would occur if the bases were uncorrelated. Rotational angles ranged between 7-14 degrees. (C) Time-lagged mutual information between the stimulus containing pairwise and diverging motion correlations and the output of the kernel bases in (A) computed using the Gaussian stimuli (*purple*), the uncorrelated stimuli (*blue*) or the entire stimulus set which included correlated stimuli (*red*). The shaded regions show the predictive information. The information curves for the kernel bases strongly overlapped, indicating that the subtle differences in bases did not strongly affect predictive motion encoding.

242 four distinct kernel combinations (bases): 1) a basis  
243 that comprised only the dominant spatiotemporal ker-  
244 nel, 2) a basis that comprised the first and second ker-  
245 nels, 3) a basis that included the first and third ker-  
246 nels, and 4) a basis that included all three kernels. We then  
247 calculated the mutual information between the outputs  
248 of these four model bases and the motion stimuli (see  
249 Methods). Moreover, we separately calculated the in-  
250 formation encoded about the past stimulus (i.e. past in-  
251 formation) and future stimulus trajectories (i.e., predic-  
252 tive information). To determine whether the additional  
253 kernels improved motion encoding, we normalized the  
254 information values relative to the condition in which a  
255 single basis kernel was used (Figure 5).

We found that the additional kernels showed distinct  
effects on the encoding of past versus predictive mo-  
tion information (Figure 5B). The additional kernels ei-  
ther weakly increased or had no effect on the encoded  
past information relative to the condition in which only  
the dominant kernel was used. These additional ker-  
nels did, however, increase predictive motion encoding  
with predictive information increasing by an average of  
>35% with the addition of the second and third ker-  
nels. These results indicate that the additional recep-  
tive field kernels improve motion encoding in these gan-  
gion cells—particularly predictive motion encoding.

To determine whether the spatial and temporal com-  
ponents of the kernel basis were interchangeable, we

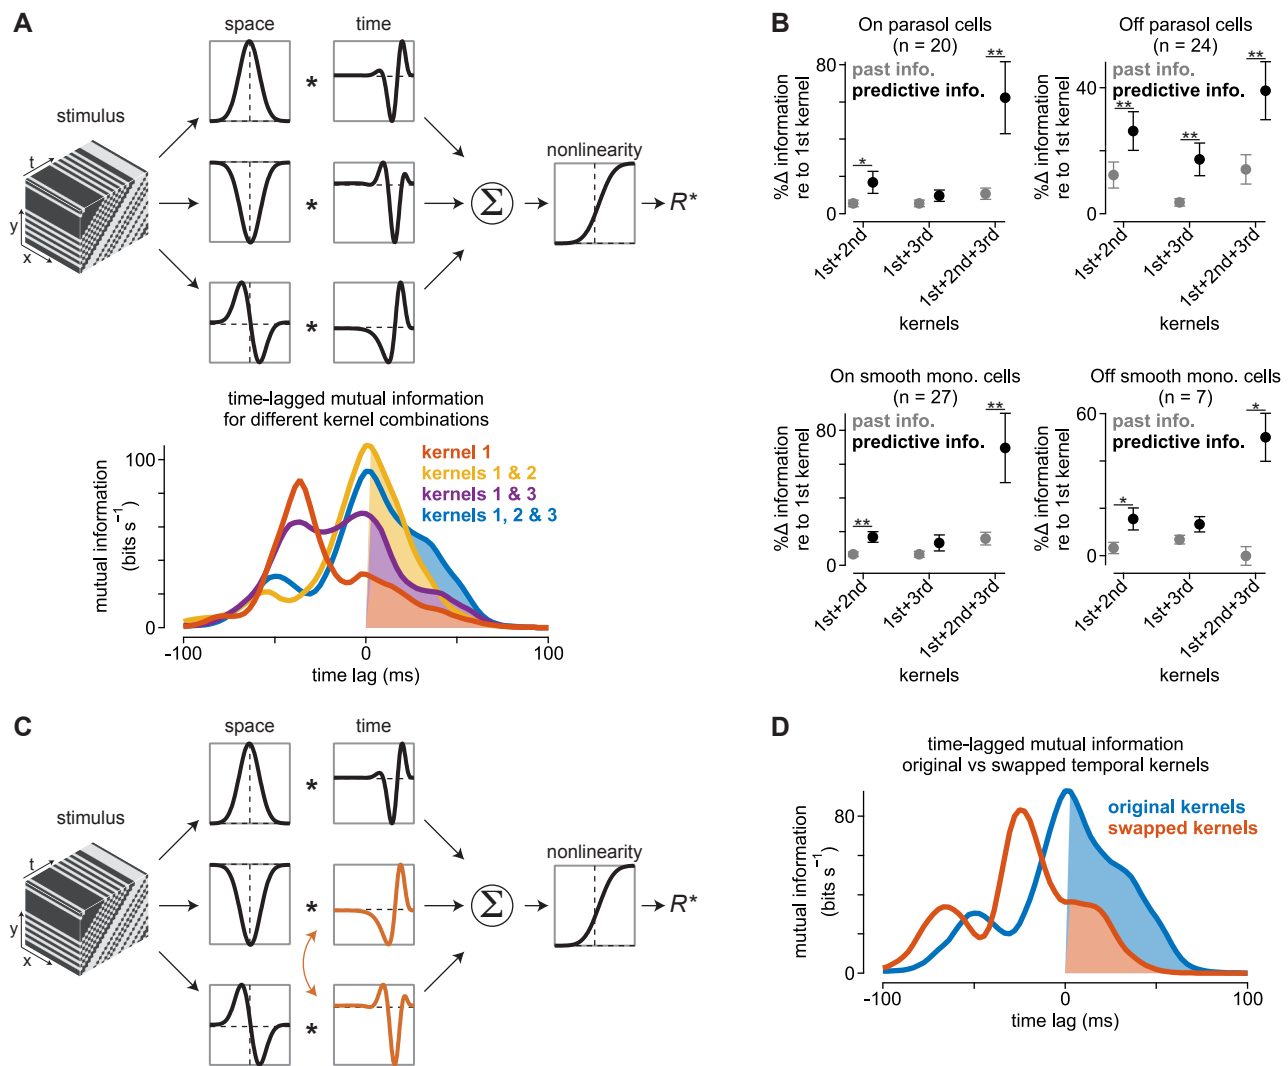

**Figure 5.** Additional receptive-field kernels improve predictive motion encoding. (A) *Top*, Spatiotemporal filtering of the stimulus in the model was performed using three space-time separable kernels estimated for each cell. The outputs of these spatiotemporal filters were summed and passed through a shared nonlinearity to produce a low-rank estimate of the neural response ( $R^*$ ). Different weight combinations were used to estimate the contribution of the kernels to encoding. *Bottom*, Time-lagged mutual information curves for the different kernel combinations in the model shown. Shaded regions indicate the predictive information. The greatest predictive information was observed when all three spatiotemporal kernels were combined. (B) Population analysis showing the change in encoded information for different kernel combinations relative to the use of the dominant kernel alone. Results are shown for On parasol ( $n = 20$ ), Off parasol ( $n = 24$ ), On smooth monostratified ( $n = 27$ ), and Off smooth monostratified ( $n = 7$ ) cells. Inclusion of the second and third kernels in the low-rank receptive field estimate generally improved information encoding with the greatest improvement occurring for predictive information. Circles and error bars indicate mean  $\pm$  SEM. Single asterisks indicate p-values  $< 0.05$  and double asterisks indicate p-values  $< 0.005$  (Wilcoxon signed rank test). (C) Model identical to that in (A) except that the temporal components of second and third kernels were swapped. (D) Mutual information curves for the original kernels (blue) from the model in (A) versus the swapped kernels from the model in (C). Shaded regions indicate the predictive information. Swapping the temporal kernel components decreased the encoding of predictive information.

270 swapped the temporal components of the second and  
271 third bases and recomputed the time-lagged mutual  
272 information between the stimulus and the model out-  
273 put (**Figure 5C**). The mutual information curves for the  
274 original and swapped kernels were distinct, with the  
275 original kernel producing a larger amount of predic-  
276 tive information than the swapped kernel (**Figure 5D**,  
277 *shaded regions*). These results indicate that the particu-  
278 lar combination of spatial and temporal features present  
279 in the measured kernels are important for predictive en-  
280 coding.

281 The second kernel recovered in On smooth monos-  
282 tratified and On parasol cells was suppressive, as pos-  
283 itive projections along this kernel decreased the gan-  
284 glion cell spike outputs (**Figure 3**). This suppressive  
285 (second) kernel further showed a large (~20 ms) de-  
286 lay in the peak response relative to the first kernel, and  
287 this delay likely explains the contribution of the kernel  
288 to predictive encoding for pairwise correlations. To test  
289 this hypothesis, we recomputed the model output af-  
290 ter shifting the second kernel in time and recalculated  
291 the mutual information between the model output and  
292 the stimulus (**Figure 6**). The peaks of the shifted ker-  
293 nels are shown relative to the peak of the first kernel  
294 to illustrate the effects of the time delay on motion en-  
295 coding. Indeed, information encoding varied as a func-  
296 tion of this time shift—predictive information was high-  
297 est when the second kernel peaked ~20-30 ms after the  
298 first kernel. Thus, the time delay between the suppres-  
299 sive kernel and the first kernel improved information  
300 encoding.

301 Why would this time delay improve predictive encod-  
302 ing? The polarity of this kernel was opposite to that  
303 of the dominant kernel, suggesting that it suppressed  
304 spiking in the cell following a time delay. Delayed sup-  
305 pression of the spike response suppresses subsequent  
306 spiking and causes the peak spike response to occur ear-  
307 lier in time (Johnston and Lagnado, 2015; Berry et al.,  
308 1999; Leonardo and Meister, 2013; Schwartz et al., 2007).  
309 Our findings here further indicate that the timing of the  
310 temporal delay is critical to this mechanism. Short de-

lays likely suppressed many of the faster, more informa- 311  
tive spikes, while long delays were likely ineffective at 312  
speeding the peak spike response (see Discussion). 313

### 314 **Nonlinear subunits produce derivative receptive field** 315 **modes**

316 The spatial profiles of many cells in the visual cortex re-  
317 semble the first derivative of a Gaussian function, simi-  
318 lar to the structure we observed in our ganglion cell  
319 recordings (**Figure 2**). However, it was unclear how  
320 components of the retinal circuit contribute to this spa-  
321 tial structure. To investigate this question, we devel-  
322 oped a subunit model of the bipolar cells providing  
323 inputs to parasol and smooth monostратified ganglion  
324 cells. Bipolar cell spatial properties were determined  
325 from direct measurements of excitatory synaptic cur-  
326 rents from ganglion cells (Manookin et al., 2018; Ap-  
327 pleby and Manookin, 2020; Liu et al., 2021). Follow-  
328 ing spatiotemporal filtering of the stimulus in the model  
329 bipolar cells, the input from each bipolar cell was passed  
330 through an input-output function that was either linear  
331 or nonlinear, after which the outputs were pooled at the  
332 level of the model ganglion cell. The model ganglion  
333 cell response was then used to extract the receptive-field  
334 structures as in **Figure 2**.

335 The first extracted filter for the linear subunit model  
336 showed a Gaussian spatial structure and biphasic tem-  
337 poral structure that was typical of the spike triggered  
338 average from a parasol or smooth monostратified gan-  
339 glion cell (**Figure 7A**). However, the additional filters  
340 extracted from the analysis were dominated by noise  
341 and lacked clear spatiotemporal structure. This result  
342 indicated that the presence of receptive field subunits  
343 alone was not sufficient to produce the additional ker-  
344 nels that were present in our neural recordings and that  
345 contributed to predictive motion encoding.

346 Which properties of the retinal circuit could give rise  
347 to these additional receptive-field structures? The dif-  
348 fuse bipolar cells that provide synaptic input to para-  
349 sol and smooth monostратified ganglion cells show  
350 strongly nonlinear relationships between their inputs



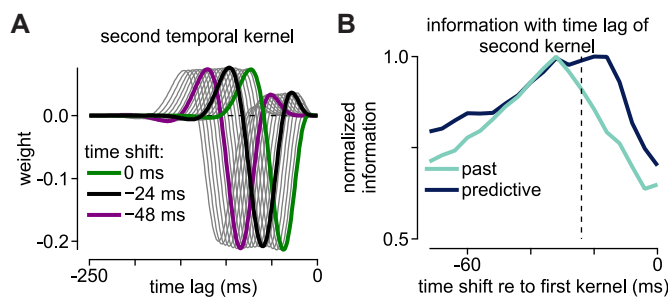

**Figure 6.** Relationship between the time lag of the second kernel and information encoding. (A) The relationship between the time lag of the second kernel and information encoding was investigated by shifting the second kernel to adjust the time at which this kernel reached a minimum value relative to the peak of the first kernel. (B) Normalized information for the model as a function of time shift in the second temporal kernel relative to the first kernel. The encoded predictive information peaked at time lags near the time lag of the estimated second kernel (dashed line).

351 and their synaptic outputs (Turner and Rieke, 2016;  
 352 Manookin et al., 2018). Thus, we tested whether this  
 353 nonlinear processing contributed to the additional re-  
 354 ceptive field modes. This nonlinear subunit model was  
 355 identical to the linear subunit model except for the non-  
 356 linear subunit output. Indeed, including a nonlinear-  
 357 ity at the model bipolar cell output resulted in addi-  
 358 tional receptive-field kernels that resembled the first  
 359 derivative of a Gaussian function, similar to what was  
 360 observed in our direct ganglion cell recordings (**Fig-**  
 361 **ure 7B**).

362 The kernels computed for the nonlinear subunit  
 363 model showed a derivative structure, but the spatial  
 364 extent of the structures were much smaller than those  
 365 observed in our direct recordings and in the model in  
 366 which the subunits were coupled (**Figure 2**, **Figure 4**,  
 367 **Figure 7C**). A possible explanation of this is that the ker-  
 368 nel structures in **Figure 7B** are dominated by only a few  
 369 of the subunits. To test this, we modified the model to  
 370 increase the integration area in the model ganglion cell  
 371 and recomputed the kernel estimates (**Figure 8**). For  
 372 the nonlinear subunit model that lacked subunit cou-  
 373 pling, tripling the diameter of the ganglion cell recep-  
 374 tive field did not dramatically affect the size of the re-  
 375 covered kernels (**Figure 8A**). Instead, the coupled sub-  
 376 unit model with both coupling between the subunits  
 377 and a nonlinearity at their outputs best reproduced the  
 378 receptive field kernels measured from the direct record-

ings. These findings indicate that both nonlinear input-  
 output functions of bipolar cells and electrical coupling  
 are necessary to explain both the shape and the extent  
 of the derivative spatial filters observed in parasol and  
 smooth monostriated ganglion cells.

### Sparse spatial integration improves encoding of pre- dictive motion information

With few documented exceptions (Manookin et al.,  
 2015), the receptive field centers of cells in the primate  
 retina are well described by a single Gaussian function.  
 Smooth monostriated ganglion cells constitute a clear  
 exception to this rule—these cells show spotty receptive  
 fields that sparsely sample visual space, but the poten-  
 tial contributions of this sparsity to predictive encoding  
 is not understood. (Rhoades et al., 2019). To deter-  
 mine how sparse spatial sampling contributed to motion  
 encoding, we extended our subunit model so that  
 the subunit outputs were either pooled using a Gaus-  
 sian receptive field or a sparse receptive field (**Figure 9**).  
 This sparse spatial receptive field was directly mea-  
 sured from an On-type smooth monostriated cell using  
 an uncorrelated spatiotemporal noise stimulus (**Fig-**  
**ure 9B, left**). Other than the spatial pooling component,  
 the two models were identical. We calculated the mu-  
 tual information between the model spike output and  
 stimulus for both models, and past versus predictive in-  
 formation were measured.

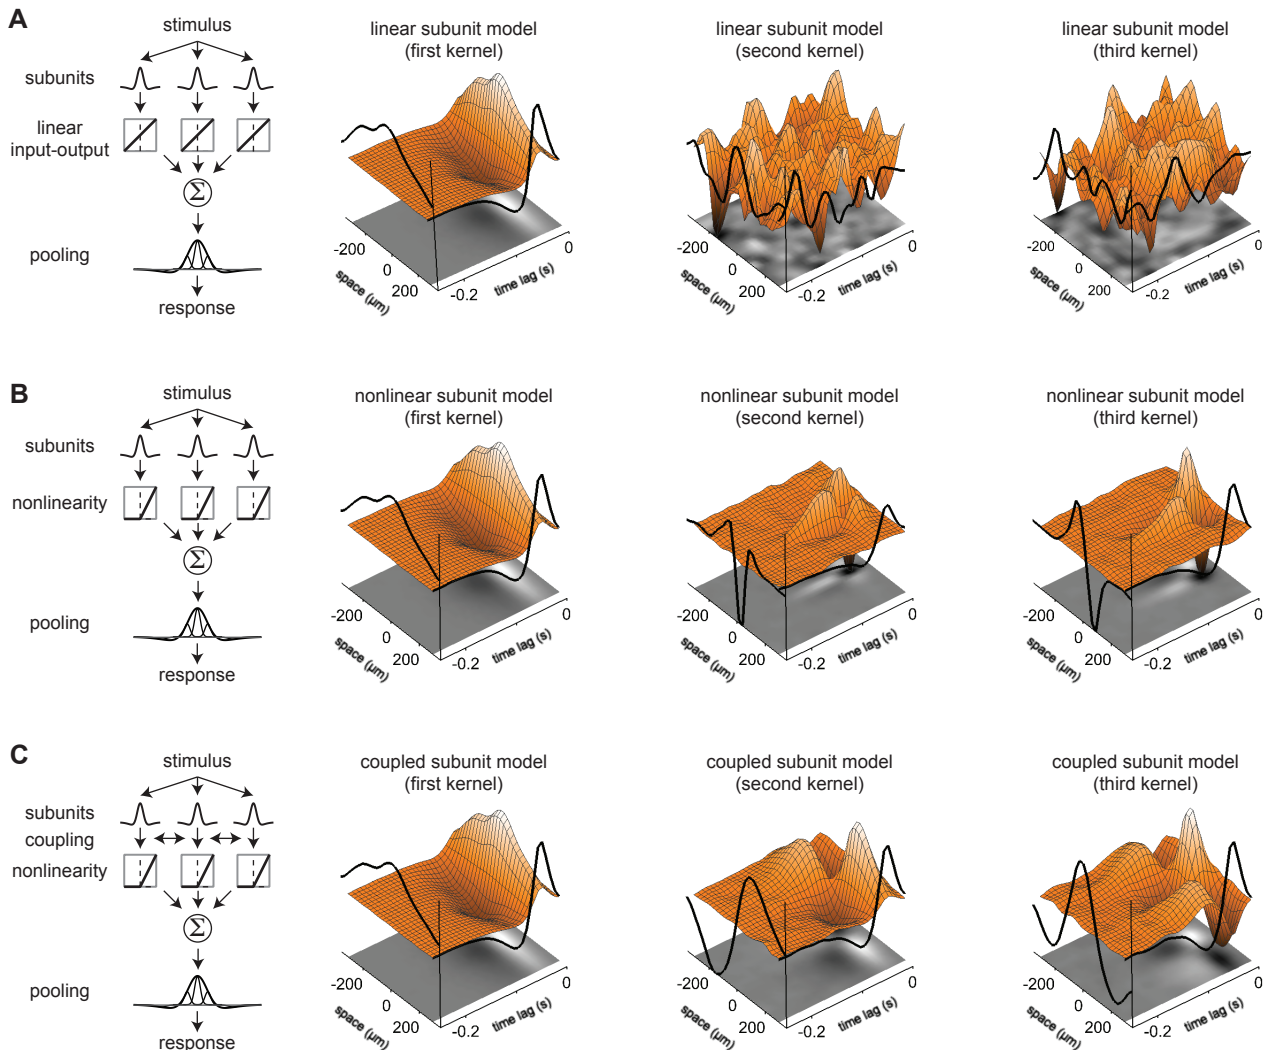

**Figure 7.** Nonlinear subunits sufficient to produce Gaussian derivative spatial kernels. (A) First three spatiotemporal kernels recovered for a subunit model in which the input-output relationship of the model bipolar cells was linear. The stimulus was 20 adjacent bars and the contrast of each bar was drawn pseudo-randomly from a Gaussian distribution in each time bin. The stimulus was filtered through the spatiotemporal receptive field of each model bipolar cell. The output of the filtering stage was then passed through the bipolar cell input-output function, after which the subunit signals were pooled and summed at the level of the model ganglion cell. The first filter showed a classical Gaussian spatial profile, but the second and third filters were dominated by noise and lacked any discernible spatiotemporal structure. (B) Spatiotemporal kernels for a model identical to that in (A) except that the input-output function for the model bipolar cell subunits was a piecewise nonlinearity (i.e., ReLU). The second kernel showed a spatial profile similar to the first derivative of a Gaussian function as was observed in the direct ganglion cell measurements. (C) Kernels for a subunit model identical to (B) except that electrical coupling was included between bipolar cell subunits. The derivative kernel was also observed, but was slightly smoother and more diffuse than that observed in (B).

406 The sparse pooling and Gaussian pooling models  
 407 showed distinct encodings of past versus predictive mo-  
 408 tion information. Encoded past information was sim-

ilar for the models (Figure 9C). However, a different  
 pattern was observed for predictive encoding—sparse  
 pooling of the subunit outputs produced a higher en-  
 409  
 410  
 411

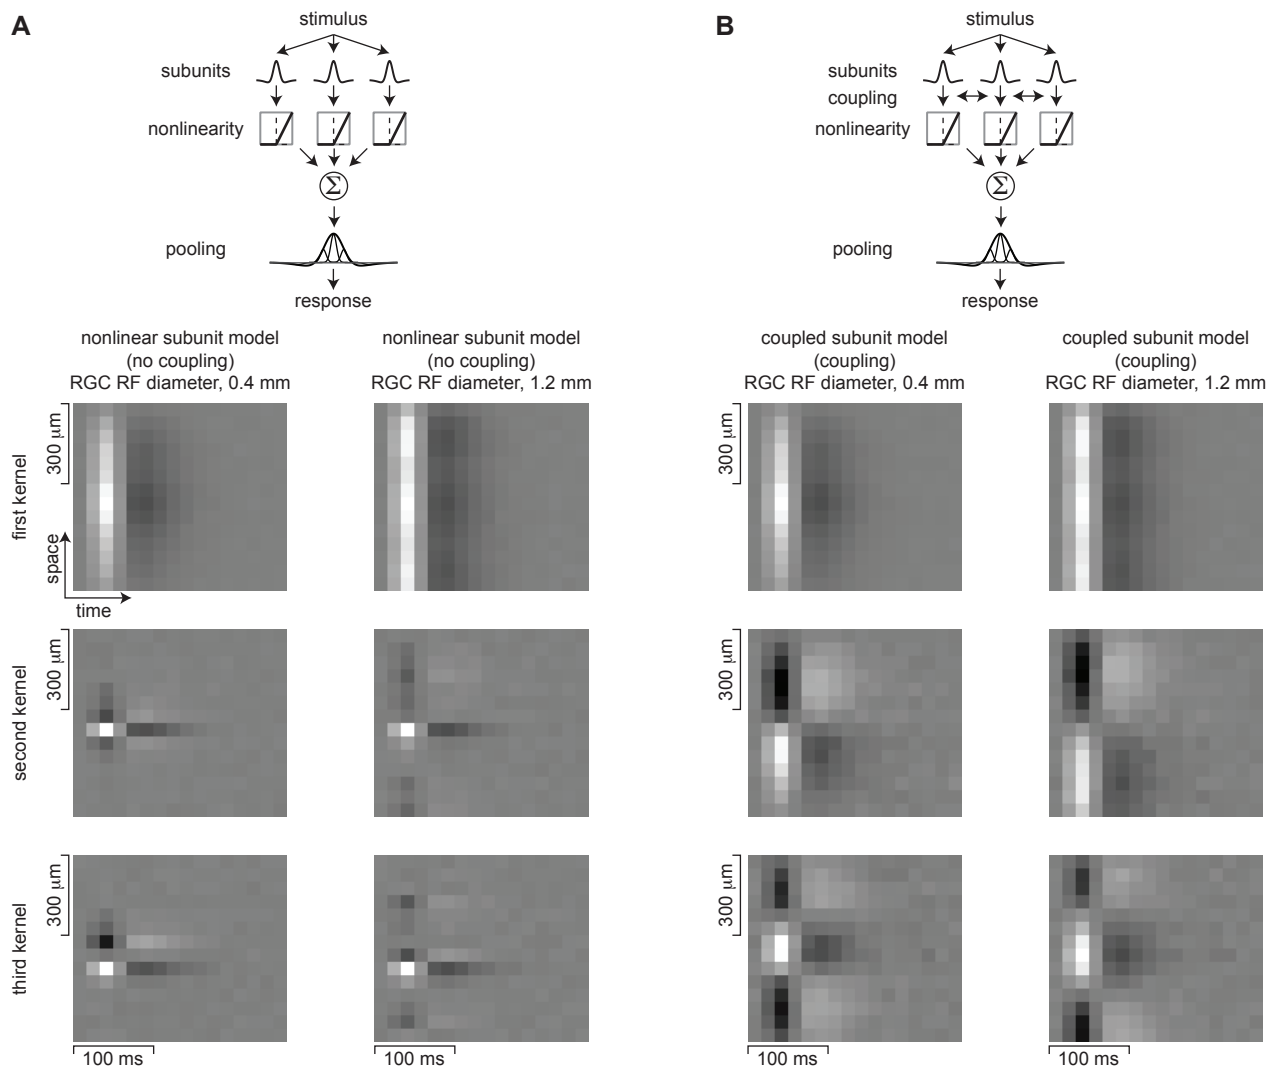

**Figure 8.** Electrical coupling between nonlinear subunits needed to explain spatial extent of receptive field kernels. (A) The first three spatiotemporal kernels computed for the nonlinear subunit model. Results are shown for ganglion cell receptive field diameters of 0.4 mm (*left column*) and 1.2 mm (*right column*). The recovered kernels for the two models were small relative to the ganglion cell receptive field diameter, suggesting that they primarily arose from only a small number of subunits. (B) Results for the coupled subunit model, which was identical to that in (A) except that the subunits were coupled. The recovered spatial structures increased with the ganglion cell receptive field size and more closely resembled the measured receptive field kernels in parasol and smooth monostratified ganglion cells. This indicates that subunit coupling could also contribute to the derivative receptive field structures.

412 coding of predictive information relative to Gaussian  
 413 pooling of the same subunit outputs. This result indi-  
 414 cates that sparse spatial sampling biases predictive in-  
 415 formation during neural encoding.

416 Mechanisms that speed the neural response tend to  
 417 increase the predictive encoding of motion (Berry *et al.*,  
 418 1999; Schwartz *et al.*, 2007; Leonardo and Meister, 2013;  
 419 Johnston and Lagnado, 2015; Liu *et al.*, 2021). Similarly,

sparse spatial sampling could also cause spiking to oc-  
 420 cur earlier and, thus, increase predictive encoding. The  
 421 sparsity of smooth monostratified cell receptive fields  
 422 is characterized by areas of sensitivity concentrated at  
 423 the margins of the receptive field and a relative lack of  
 424 sensitivity in the center [see Figure 3 of (Rhoades *et al.*,  
 425 2019)]. Thus, a sparse sampling may cause a cell to re-  
 426 spond earlier as a moving object encroaches upon the  
 427

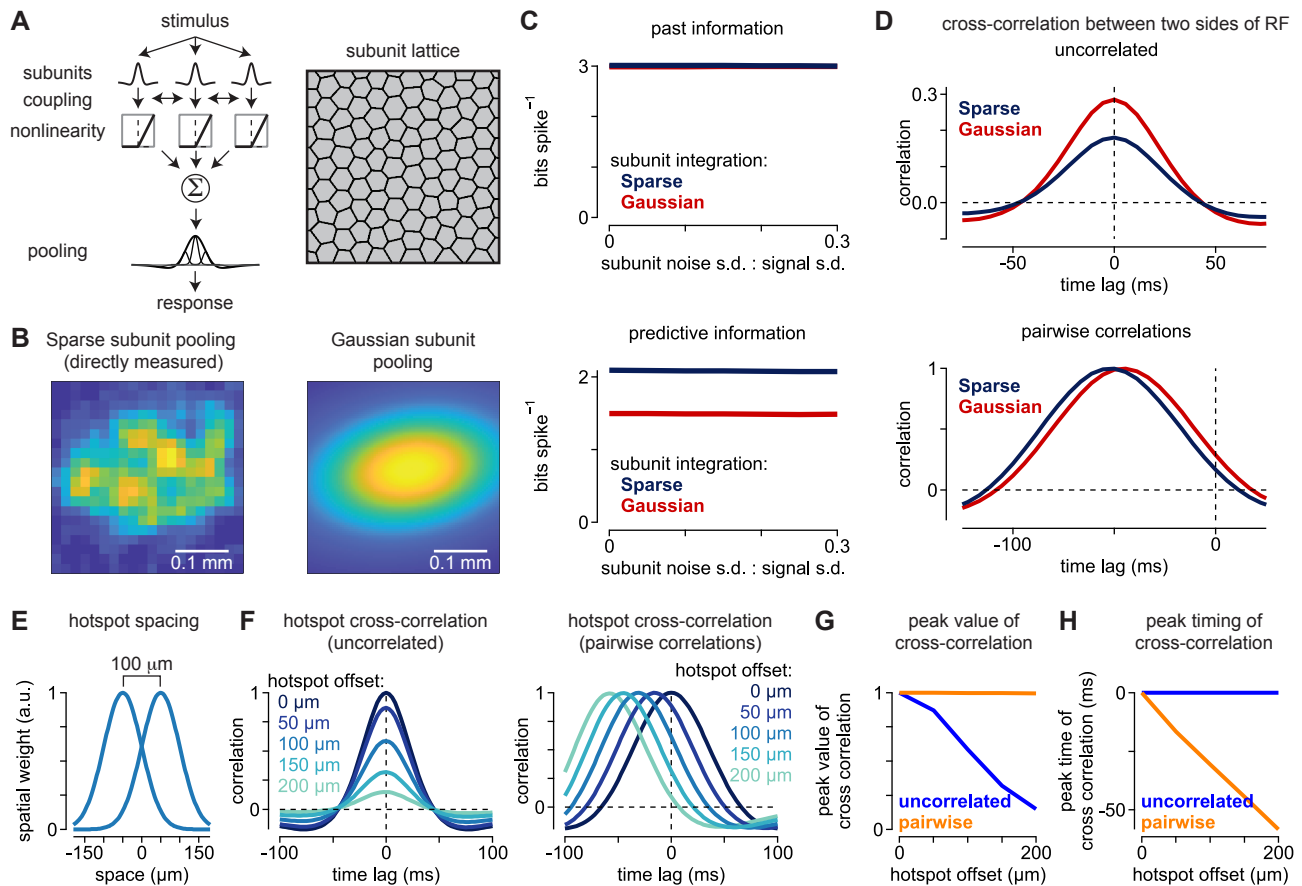

**Figure 9.** Sparse pooling of receptive-field subunits increases predictive motion encoding. (A) Subunit model organization. The stimulus was filtered by the spatiotemporal receptive field of each model bipolar subunit. A portion of the response in each bipolar cell was shared with neighboring bipolar cells via electrical coupling after which the model bipolar currents were passed through a piecewise nonlinearity. Pooling of these rectified signals then occurred at the level of the model ganglion cell. (B) Pooling of the signals from model subunits occurred either using a spatial receptive field profile that was directly measured in a smooth monostratified ganglion cell (*left*) or using a two-dimensional Gaussian fit to the receptive field (*right*). Scale bars, 0.1 mm. (C) *Top*, Past information encoded in bits spike<sup>-1</sup> as a function of the amount of additive noise in the individual subunits prior to coupling and the nonlinear output. Noise is shown as the ratio between the noise standard deviation and the signal standard deviation. Gaussian pooling and sparse pooling produced similar amounts of past information encoding. *Bottom*, Encoded predictive information for the two models. Sparse pooling of bipolar subunits produced higher encoding of predictive information than Gaussian pooling across noise levels. (D) Cross-correlation between the left and right halves of the receptive field for an uncorrelated stimulus (*top*) and a stimulus containing pairwise spatiotemporal correlations (*bottom*). The uncorrelated stimulus produced lower correlation values for the sparse sampling versus Gaussian sampling of the subunits (*top*). For the pairwise correlations, peak correlation values were similar, but sparse sampling produced a larger shift in the temporal lag between the two sides of the receptive field, consistent with the higher degree of predictive encoding in (C). (E) Simplified model of spatial sparsity in which the receptive field was comprised of two identical Gaussian hotspots that varied only in their spatial offsets ( $\sigma$ , 50  $\mu\text{m}$ ; offset, 0-200  $\mu\text{m}$ ). The hotspots independently integrated the subunit outputs. (F) Cross-correlation between the two hotspots for the uncorrelated (*left*) and pairwise correlation stimuli (*right*). As separation between the hotspots increased, the correlation decreased for the uncorrelated stimulus, but remained unchanged for the motion stimulus. However, the peak of the cross-correlation occurred earlier for the motion stimulus as separation increased. (G) Correlation as a function of hotspot offset for the uncorrelated stimulus (*blue*) and pairwise correlations (*orange*). (H) Timing of the peak of the cross-correlation as a function of hotspot offset for the uncorrelated stimulus (*blue*) and pairwise correlations (*orange*).

edge of the receptive field than if the sampling were Gaussian with the highest sensitivity regions concentrated toward the receptive field center.

To test this idea, we computed the cross-correlation between the two halves of the model ganglion cell receptive field during the stimulus with pairwise motion correlations. If the cell were responding earlier, then the peak of the cross-correlation would be shifted to earlier time points. Indeed, the cross-correlation peaked earlier for the model with sparse spatial sampling than for the Gaussian sampling model (**Figure 9D**). This result indicates that the sparse integration model showed higher levels of predictive motion encoding relative to the Gaussian model, in part, because the sparsity of the receptive field caused motion responses to occur earlier in time (see Discussion).

#### Neural adaptation enhances predictive encoding

The Gaussian derivative spatial kernels that we observed in parasol and smooth monostratified cells increase a cell's sensitivity to changes occurring across space. These cells also show strongly biphasic temporal kernels, which further increase their ability to detect changes in time (Rhoades et al., 2019). Together these receptive field components, largely inherited from their presynaptic inputs, increase a cell's ability to detect the changes in space and time that occur during visual motion (Kuo et al., 2016; Manookin et al., 2018). Neural adaptation is an additional mechanism that increases a cell's ability to detect changes in their inputs (Fairhall et al., 2001; Smirnakis et al., 1997).

Adaptation adjusts a cell's output to match the statistics of the incoming stimulus, which increases the cell's sensitivity to changes in the stimulus. Indeed, adaptation was proposed as the principal mechanism for predicting translational motion in the salamander retina (Berry et al., 1999; Schwartz et al., 2007; Leonardo and Meister, 2013). These previous studies examined the contribution of the gain control mechanism in the context of transient motion into and out of the receptive-field center and only to pairwise spatiotemporal correla-

tions. Thus, the potential contribution of gain control to predictive encoding for continuous motion and triplet spatiotemporal correlations has not been carefully studied.

To investigate whether adaptation contributes to predictive encoding for diverging and converging spatiotemporal correlations, we developed a computational model of smooth monostratified cells that included this mechanism. We estimated the temporal filtering and adaptation properties of bipolar cell inputs and spike outputs of a ganglion cell by recording excitatory synaptic currents or spike responses to a spatially uniform spot presented over the cell's receptive field (**Figure S3**). The contrast of the spot was drawn randomly from a Gaussian distribution in each stimulus period (mean, 0.0; standard deviation, 0.3). The data were then analyzed using a generalized linear model (GLM) (Pillow et al., 2008; Paninski, 2004; Truccolo et al., 2005). In addition to modeling the temporal filtering properties of a cell, this model framework accounts for the modulation of neural output based on the recent history of neural responses (an adaptation filter). For this reason, generalized linear models have been useful in modeling adaptation in neurons (Latimer and Fairhall, 2020; Weber and Pillow, 2017; Latimer et al., 2019; Mease et al., 2013).

The generalized linear model comprised three processing stages: 1) a temporal kernel that filtered the incoming stimulus, 2) a point nonlinearity that mapped the output of the temporal filtering stage to a neural output (spikes or conductance), and 3) an adaptation filter that provided feedback to the output of the temporal filtering stage based on the recent neural output. This final stage behaved similarly to gain control mechanisms that suppress neural responses following strong outputs (Latimer and Fairhall, 2020; Weber and Pillow, 2017). To measure the time course of adaptive feedback, we fit the adaptation filters with a single exponential. The adaptation decayed rapidly for both spiking and excitatory synaptic currents, indicating that this feedback suppressed neural responses on relatively short



509 time frames (decay time constant: spiking, 5.9 ms; exci-  
510 tatory currents, 5.0 ms; **Figure S3D**).

511 To determine whether adaptation influenced predic-  
512 tive encoding for pairwise and triplet spatiotempo-  
513 ral correlations, we incorporated the empirically de-  
514 termined filters into our circuit model. The adapta-  
515 tion filters were implemented at one of two sites in the  
516 model—either at the bipolar cell or ganglion cell out-  
517 puts (**Figure 10**). The output of this filter was normal-  
518 ized to the same standard deviation as the output of  
519 the temporal filter so that the contribution of adaptation  
520 could be properly quantified. We tested whether the  
521 magnitude of adaptation affected predictive encoding  
522 by varying the weight of the adaptation filter (weight,  
523 0-1) with a weight of zero corresponding to a model  
524 lacking adaptation. We further tested for interactions  
525 between adaptation and neural sparsity by varying the  
526 fraction of time bins in which spiking occurred.

527 These model simulations indicated that moderate  
528 gain control was beneficial to predictive motion encod-  
529 ing (**Figure 10B, D**). The computed predictive informa-  
530 tion peaked near adaptation weights of  $\sim 0.2$ - $0.4$  and  
531 decreased at lower and higher values. This trend was  
532 observed for the models with both sparser and denser  
533 temporal coding (**Figure 10B, D, top row**), and it was  
534 also true for the models in which adaptation occurred  
535 at either the bipolar cell or ganglion cell outputs. Ob-  
536 serving these results across a range of model condi-  
537 tions highlights the benefit of moderate adaptation in  
538 predictive encoding. Thus, consistent with previous  
539 findings, moderate adaptation increased predictive mo-  
540 tion encoding (Berry *et al.*, 1999; Schwartz *et al.*, 2007;  
541 Leonardo and Meister, 2013).

542 Mechanisms such as adaptation that speed the neu-  
543 ral response are generally considered beneficial to pre-  
544 dictive encoding (Berry *et al.*, 1999; Schwartz *et al.*,  
545 2007; Leonardo and Meister, 2013). Similar to de-  
546 layed inhibition (**Figure 6**), following strong neural re-  
547 sponses, adaptation mechanisms provide negative feed-  
548 back, which decreases subsequent responses (Kim and  
549 Rieke, 2001; Fairhall *et al.*, 2001; Baccus and Meister,

2002). This effectively makes responses peak earlier  
550 and increases the amount of predictive information in  
551 the neural output. However, our results indicate that  
552 adaptation is advantageous only within a fairly limited  
553 range—when the magnitude of adaptation exceeded  
554  $\sim 40\%$  of the spatiotemporal filter output, predictive en-  
555 coding was suppressed. 556

557 This range in which adaptation supports predictive  
558 encoding may reflect a tradeoff between speeding the  
559 neural response by removing spikes (moderate adapta-  
560 tion) and removing informative spikes that degrade in-  
561 formation encoding (strong adaptation). For example,  
562 moderate adaptation (weight, 0.3) increased the mu-  
563 tual information at positive time lags relative to the un-  
564 adapted condition, resulting in an increase in predictive  
565 information (**Figure S4**). However, the excessive sup-  
566 pression of spiking caused by strong adaptation caused  
567 a net decrease in information at positive time lags rela-  
568 tive to the unadapted condition.

## DISCUSSION

569 A central pursuit of computational and systems neuro-  
570 science is to understand the relationship between stim-  
571 uli in the external environment and neural responses.  
572 Here, we studied how properties of the retinal circuit  
573 contribute to motion encoding in primates. We found  
574 that several circuit properties collectively improved the  
575 ability of parasol and smooth monostratified ganglion  
576 cells to encode information about visual motion. This  
577 improvement was particularly evident for predictive  
578 motion encoding—the ability of the cell to convey in-  
579 formation about the future trajectory of moving objects  
580 (**Figure 2, Figure 4, Figure 5, Figure 6, Figure 9**). Non-  
581 linear mechanisms such as the rectified synaptic release  
582 from bipolar cells and adaptation further enhanced  
583 predictive motion encoding (**Figure 7, Figure 10, Fig-  
584 ure S4**). Thus, several properties of parasol and smooth  
585 monostratified ganglion cells support accurate estima-  
586 tion of trajectories of moving objects.

587 Several receptive-field properties that contribute to  
588 predictive motion encoding are strong candidates for

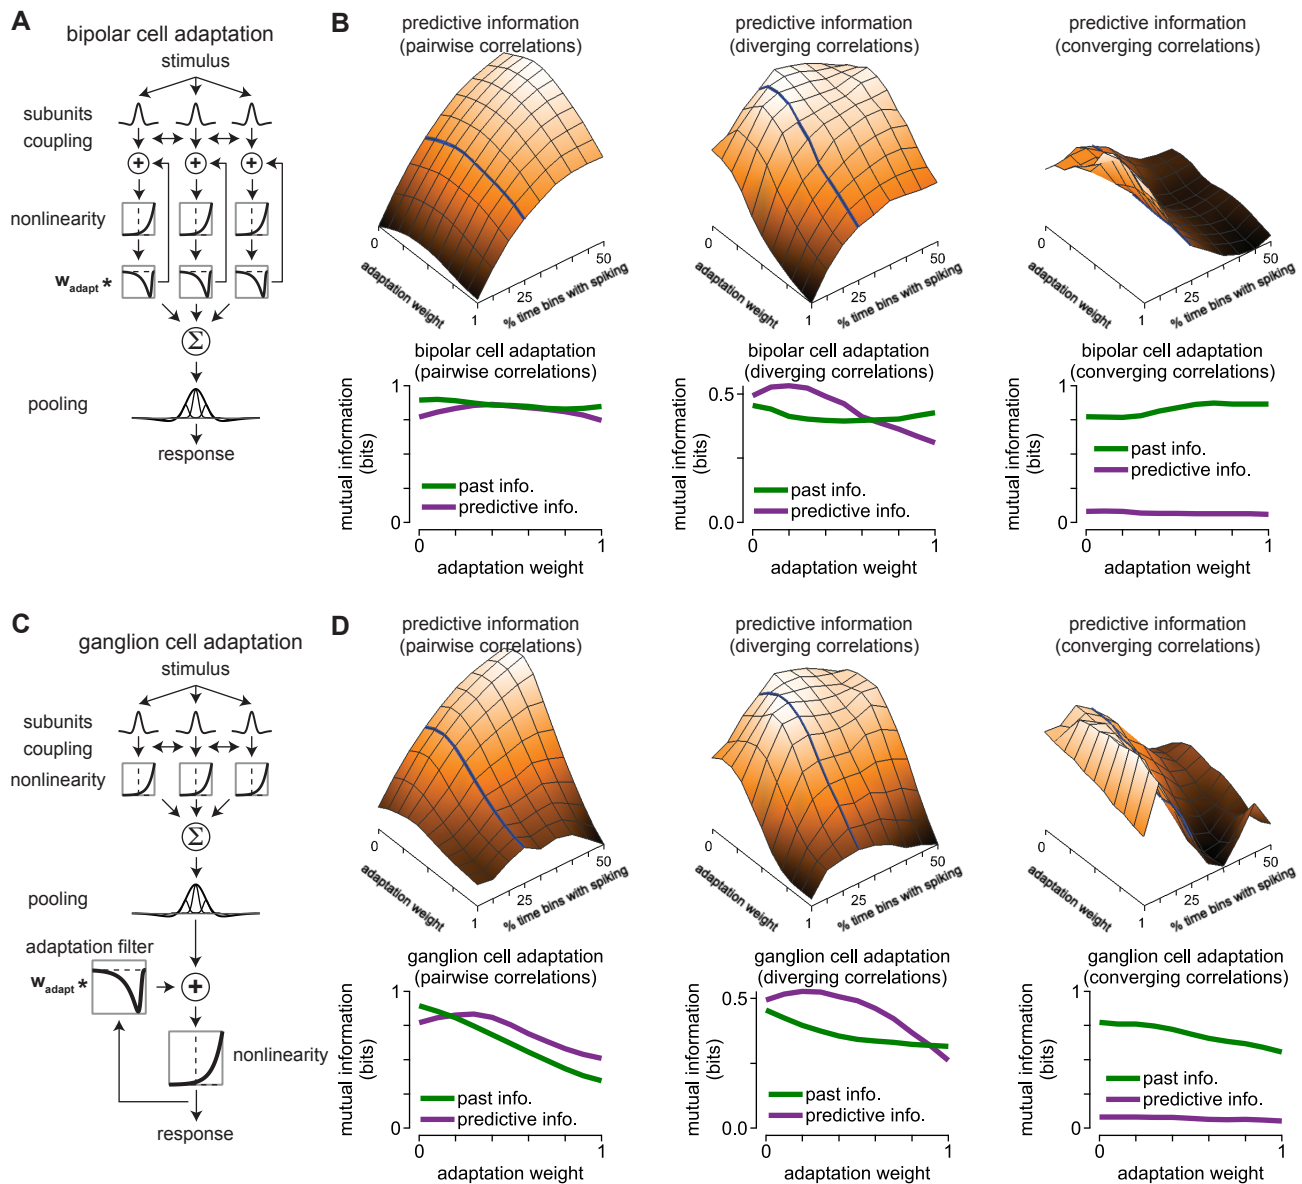

**Figure 10.** Moderate adaptation improves predictive encoding for spatiotemporal correlations. (A) Organization of the bipolar cell adaptation model. An adaptation filter was applied to model signals based on the recent output of each model bipolar cell subunit—stronger outputs resulted in greater suppression of model signals prior to the output nonlinearity. (B) Contribution of bipolar cell adaptation to encoding of past and future (predictive) information. *Top*, Surface showing the encoded predictive information as a function of the adaptation weight and temporal sparsity (percentage of time bins containing a spike). Surfaces are shown for pairwise (*left*), diverging (*middle*), and converging (*right*) spatiotemporal correlations. *Bottom*, Past and predictive information as a function of adaptation weight. Curves are shown for a temporal sparsity value of 25% (*top*, solid line). (C) Organization of a model in which adaptation occurs at the ganglion cell level. (D) Information curves as in (B) for the ganglion cell adaptation model. Predictive information encoding peaked for adaptation weights of 0.2-0.4 and decreased at higher values.

589 contributing to predictive computations in other sensory regimes. For example, the spatiotemporal deriva-  
 590 tive kernel improved predictive motion estimation, and  
 591 similar derivative kernels are found in both the visual  
 592

and auditory regions of the cortex (DeAngelis et al., 593  
 1993a,b; De Valois and Cottaris, 1998; deCharms et al., 594  
 1998; Singer et al., 2018). Furthermore, delayed sup- 595  
 596

597 anisms and synaptic inhibition are common features  
598 of neural circuits throughout the brain. This suppres-  
599 sion contributes to prediction by speeding neural re-  
600 sponses and thus overcoming some of the temporal de-  
601 lays inherent in neural processing (Berry *et al.*, 1999;  
602 Schwartz *et al.*, 2007; Johnston and Lagnado, 2015). Fi-  
603 nally, sparse signal integration is another mechanism,  
604 identified here, that could contribute to predictive com-  
605 putations in other neural systems (**Figure 9**). This  
606 mechanism is discussed further in the following text.

### 607 **Linear receptive field properties improve motion esti-** 608 **mation**

609 The encoding of correlations is at the core of the predic-  
610 tive computation. In principle, two points within the  
611 receptive field that are correlated with each other can  
612 participate in predictive encoding if the activity in one  
613 point at a particular time predicts the activity in the sec-  
614 ond point at a later time. Furthermore, this contribu-  
615 tion to predictive encoding would occur even if the re-  
616 lationship between the points is linear. Our previous  
617 work focused on the contribution of two circuit proper-  
618 ties to predictive motion encoding—electrical coupling  
619 and the bipolar cell synaptic output (Liu *et al.*, 2021).  
620 The results presented here indicate that other receptive  
621 field properties also contribute to this computation.

622 The spatial receptive fields of parasol and smooth  
623 monostратified ganglion cells consistently showed a  
624 spatial kernel resembling the derivative of a Gaussian  
625 function (**Figure 2**). This structure’s importance lies  
626 in the adjacent On and Off subregions within the re-  
627 ceptive field. The balanced weighting of these regions  
628 means that the output of this kernel will be weak or  
629 absent for stimuli that do not vary in intensity. How-  
630 ever, responses will be strong for stimuli that vary in  
631 their intensity, such as when the edge of an object moves  
632 through the receptive field. Indeed, this spatial re-  
633 ceptive field profile is common in cortical cells that  
634 contribute to motion processing (Adelson and Bergen,  
635 1985; Emerson *et al.*, 1992; Reid *et al.*, 1987, 1991; Rust  
636 *et al.*, 2005).

We treated this derivative spatial structure as a lin- 637  
ear operator and assessed its contribution to motion en- 638  
coding (**Figure 5**), but this structure can also arise as 639  
a property of nonlinear signaling in bipolar cells (**Fig- 640**  
**ure 7**). This bipolar cell origin is key to understanding 641  
how stimuli will exercise the derivative spatial struc- 642  
ture. While the derivative structures that we measured 643  
were oriented along the long axis of the bars that were 644  
presented, the orientation of this receptive field struc- 645  
ture should be stimulus dependent. This pliancy differs 646  
from the properties of motion sensitive neurons in the 647  
visual cortex that show static receptive field orientations 648  
(Adelson and Bergen, 1985; Emerson *et al.*, 1992; Reid 649  
*et al.*, 1987, 1991; Rust *et al.*, 2005). Thus, the represen- 650  
tation of visual motion in parasol and smooth monos- 651  
trатified ganglion cells is simultaneously less selective 652  
and more flexible in its orientation than that found in 653  
downstream visual areas. 654

### 655 **Sparse spatial sampling improves predictive encoding**

656 The spatial component of smooth monostратified gan- 656  
glion cell receptive fields shows sparse sampling rela- 657  
tive to many other mammalian ganglion cell types, 658  
but the functional implications of this sparsity are not 659  
known (Rhoades *et al.*, 2019). We asked whether 660  
sparse sampling contributes to motion encoding by 661  
comparing two models that differed only in their spatial 662  
sampling—a uniform Gaussian sampling and a sparse 663  
sampling taken from direct receptive-field measure- 664  
ments (**Figure 9**). Indeed, past and predictive informa- 665  
tion encoding differed between these two models with 666  
sparse sampling encoding more predictive information 667  
than Gaussian sampling. 668

669 Sparse spatial sampling appears to benefit predictive 669  
encoding, at least in part, by causing a cell to respond 670  
earlier when a moving object encroaches on the edge 671  
of the receptive field than for a smooth receptive field 672  
(**Figure 9D**). Indeed, speeding of response kinetics is 673  
a critical component of motion anticipation in the sala- 674  
mander and fish retinas (Berry *et al.*, 1999; Johnston and 675  
Lagnado, 2015; Leonardo and Meister, 2013; Schwartz 676

et al., 2007). Smooth monostratified ganglion cells show sensitivity to stimuli falling only within limited regions within the receptive field, and these sensitive regions are separated by areas lacking sensitivity [(Rhoades et al., 2019); **Figure 9B**]. Moreover, these sensitive regions are typically found toward the edges of the receptive field. Thus, objects moving into the margins of the receptive field will tend to contact a sensitive region and evoke responses before contacting less sensitive regions. This causes responses to occur earlier than if the cell were sampling space with a Gaussian receptive field in which the strongest regions are located at the center.

This sparse sampling does sacrifice some spatial acuity as a cell will not respond to objects falling in certain regions of the receptive field. However, cortical neurons likely have access to signals from multiple ganglion cell types and these signals can then be combined in ways that allow cortical neurons to compute local motion signals on a finer spatial scale (Movshon and Newsome, 1996; Hubel and Wiesel, 1974). Thus, the spatial sampling in smooth monostratified cells may be sufficient for detecting visual motion and a benefit of this sparse sampling is that it promotes predictive encoding in a similar way to adaptation mechanisms—by biasing responses to moving objects at the edge of the receptive field (Berry et al., 1999).

### Delayed suppression improves predictive encoding

Several studies have highlighted adaptation (gain control) as the key mechanism contributing to predictive motion estimation in salamander retina (Berry et al., 1999; Leonardo and Meister, 2013; Schwartz et al., 2007). However, another study in the fish retina indicated that feedforward inhibition played the principal role in this computation (Johnston and Lagnado, 2015). Our findings here indicate that both mechanisms can work in concert to improve motion estimation.

The central idea is that these mechanisms work on different time scales to speed the neural response (**Figure 6, Figure 10, Figure S4**). Adaptation provides rapid feedback following strong spiking, which suppresses

subsequent spiking and causes the peak spike response to occur earlier. This suppression occurs and decays rapidly and thus acts on relatively short time scales (decay time constant, 5.0-5.8 ms). Our results further indicate that the strength of this feedback must be properly tuned in order to be effective—strong adaptation suppressed informative spikes and degraded information encoding (**Figure 10, Figure S4**).

We also observed a suppressive kernel that showed a temporal delay relative to the dominant kernel. This kernel peaked approximately 20 ms after the dominant kernel and showed more sustained kinetics than adaptation (**Figure 2**). For the purposes of this study we do not claim that this kernel arises from amacrine cells, but the temporal delay and effects on predictive coding are qualitatively similar to those mediated by feedforward inhibition in the fish retina in that they both improved predictive motion estimation [**Figure 6**; (Johnston and Lagnado, 2015)]. Thus, this suppressive kernel and adaptation can modulate neural dynamics on different time scales and fine tune predictive motion information arising in the excitatory circuitry (Liu et al., 2021).

### ACKNOWLEDGEMENTS

We thank Shellee Cunnington for technical assistance. Tissue was provided by the Tissue Distribution Program at the Washington National Primate Research Center (WaNPRC; supported through NIH grant P51 OD-010425), and we thank the WaNPRC staff, particularly Chris English and Audrey Baldessari, for making these experiments possible. Chris Chen assisted in tissue preparation. This work was supported in part by grants from the NIH (NEI R01-EY027323 to M.B.M.; NEI R01-EY029247 to E.J. Chichilnisky, F.R., and M.B.M.; NEI R01-EY028542 to F.R.; NEI P30-EY001730 to the Vision Core), Research to Prevent Blindness Unrestricted Grant (to the University of Washington Department of Ophthalmology).



## AUTHOR CONTRIBUTIONS

754 Conceptualization, M.B.M.; Methodology, B.L., A.H.,  
755 F.R., and M.B.M.; Software, M.B.M.; Formal Analysis,  
756 B.L. and M.B.M.; Investigation, M.B.M.; Resources, F.R.  
757 and M.B.M.; Data Curation, M.B.M.; Writing – Original  
758 Draft, M.B.M.; Writing – Review and Editing, B.L.,  
759 A.H., F.R., and M.B.M.; Visualization, B.L. and M.B.M.;  
760 Supervision, F.R. and M.B.M.; Project Administration,  
761 F.R. and M.B.M.; Funding Acquisition, F.R. and M.B.M.

## COMPETING INTERESTS

762 The authors declare no competing interests.

## METHODS

763 Experiments were performed using an *in vitro*, pigment-  
764 epithelium attached preparation of the macaque mon-  
765 key retina from three different macaque species of ei-  
766 ther sex (*Macaca fascicularis*, *mulatta*, and *nemestrina*).  
767 Tissues were obtained from terminally anesthetized an-  
768 imals that were made available through the Tissue Dis-  
769 tribution Program of the National Primate Research  
770 Center at the University of Washington. All procedures  
771 were approved by the University of Washington Institu-  
772 tional Animal Care and Use Committee.

773 Recorded cells were located in the macular, mid-  
774 peripheral, or peripheral retina (2-8 mm, 10-30° foveal  
775 eccentricity). Data were acquired using a Multiclamp  
776 700B amplifier (Molecular Devices), digitized using an  
777 ITC-18 analog-digital board (HEKA Instruments), and  
778 acquired using the Symphony data acquisition software  
779 (<http://symphony-das.github.io>). Other analyses of  
780 this dataset are published elsewhere (Liu et al., 2020,  
781 2021).

## Visual stimuli

783 Visual stimuli were generated using the Stage software  
784 package (<http://stage-vss.github.io>) and displayed on  
785 a customized digital light projector (Appleby and  
786 Manookin, 2019, 2020). Stimuli were presented at  
787 medium to high photopic light levels with average L/M-  
788 cone photoisomerization rates ( $R^*$ ) of  $\sim 1.5 \times 10^4 - 5.0$

$\times 10^5 \text{ s}^{-1}$ .

789

## Receptive-field kernel estimation

790

791 Our goal was to describe the relationship between the  
792 stimulus ( $\mathbf{s}$ ) and a cell's spike output ( $\mathbf{r}$ ) using three  
793 spatiotemporal kernels ( $\mathbf{K}$ ). The computing time re-  
794 quired to run the algorithm made calculating more  
795 than three kernels for each cell computationally in-  
796 tractable. We estimated the kernels that maximized  
797 the average information conveyed by a single spike  
798 about the stimulus projected onto  $\mathbf{K}$  (Sharpee et al.,  
799 2004; Williamson et al., 2015). First, the prior stimu-  
800 lus distribution was determined by projecting the stim-  
801 ulus onto a candidate kernel basis ( $p(\mathbf{K}^\top \mathbf{s})$ ) and the  
802 spike-triggered distribution was determined by pro-  
803 jecting the stimuli that elicited spiking onto this basis  
804 ( $p(\mathbf{K}^\top \mathbf{s} | \text{spike})$ ). The single-spike information ( $I_{\text{spike}}$ )  
805 was then determined by calculating the separation be-  
806 tween these distributions using the Kullback-Leibler di-  
807 vergence (Williamson et al., 2015).

$$I(\mathbf{K}) = D_{KL} \left( p(\mathbf{K}^\top \mathbf{s} | \text{spike}) \parallel p(\mathbf{K}^\top \mathbf{s}) \right) \quad (1)$$

808 where  $D_{KL}$  is the Kullback-Leibler divergence and  
809  $p(\mathbf{K}^\top \mathbf{s})$  and  $p(\mathbf{K}^\top \mathbf{s} | \text{spike})$  are the raw and spike-  
810 triggered stimulus distributions projected onto  $\mathbf{K}$ .

811 The nonlinear relationship between the stimulus pro-  
812 jection onto the kernel basis ( $\mathbf{K}$ ) and the spike rate of  
813 the cell was determined using an exponential mapping  
814 between the stimulus projection onto the basis and the  
815 spike output of the cell ( $\mathbf{r}$ ). To aid in fitting, the nonlin-  
816 earity was parameterized using radial basis functions  
817 ( $\phi$ , Equation 2).

$$\mathbf{r} = \exp \left( \sum_{i=1}^{n_\phi} \alpha_i \phi_i(\mathbf{K}^\top \mathbf{s}) \right) \quad (2)$$

818 where  $\alpha$  are the linear weights on the radial basis func-  
819 tions (Williamson et al., 2015).

## Estimation of 1D and 2D nonlinearities

820

821 The shared nonlinearity between the kernels was de-  
822 termined by computing the spiking probability condi-



tioned on the stimulus projection onto the individual kernels. The individual kernel nonlinearities were then determined by computing the average spike probability along each kernel projection axis.

The two-dimensional nonlinearity representing the condition in which each kernel had a separate nonlinearity was then determined by taking the outer product of the average kernel nonlinearities (Equation 3), and then scaling this nonlinearity such that the total spike probability matched that of the shared nonlinearity.

$$f_{separable} = p(\text{spike}|\mathbf{k}_i^\top \mathbf{s}) p(\text{spike}|\mathbf{k}_j^\top \mathbf{s})^\top \quad (3)$$

where  $\mathbf{k}_i$  and  $\mathbf{k}_j$  are the  $i$ th and  $j$ th spatiotemporal kernels.

### Spatial kernel modeling

We modeled the spatial component of the kernel estimates as either a Gaussian function (Equation 4) or the derivative of a Gaussian (Equation 5).

$$g(x, \sigma) = \frac{A}{\sigma\sqrt{2\pi}} \exp\left(-\frac{(x-\mu)^2}{2\sigma^2}\right) \quad (4)$$

$$\frac{\delta g(x, \sigma)}{\delta x} = -A \frac{(x-\mu)}{\sigma^3\sqrt{2\pi}} \exp\left(-\frac{(x-\mu)^2}{2\sigma^2}\right) \quad (5)$$

where  $\mu$  is the spatial offset of the receptive-field center in microns,  $\sigma$  is the standard deviation in microns, and  $A$  scales the amplitude of the resulting function.

The spatial component of each kernel was fit with both functions and goodness-of-fit was determined by calculating the Pearson correlation ( $r^2$ ) between the fit and the raw data (see **Figure 2**).

### Generalized linear model

We used a generalized linear model framework to represent temporal filtering and adaptation at either the bipolar cell synaptic output or the ganglion cell spike output. The time-varying neural response ( $\mathbf{r}_t$ ) was modeled as a nonlinear function ( $f$ ) of the projection of the temporal kernel ( $\mathbf{k}$ ) onto the stimulus ( $\mathbf{s}_t$ ) summed with the projection of a filter that captures the history-dependence of the neural response ( $\mathbf{h}$ ) onto the history

of neural responses ( $\mathbf{y}_{history,t}$ ).

$$\mathbf{r}_t = f\left(\mathbf{k}^\top \mathbf{s}_t + \mathbf{h}^\top \mathbf{y}_{history,t} + \mu\right) \quad (6)$$

where the rows of  $\mathbf{s}_t$  are time samples and the columns are the stimulus vector in the 500 ms preceding time  $t$ . Similarly, the rows of the response history matrix ( $\mathbf{y}_{history,t}$ ) are time samples and the columns are the neural responses the 100 ms preceding time  $t$ . The scalar variable  $\mu$  represents the maintained neural response.

For the excitatory synaptic signals measured in voltage-clamp, the synaptic conductance was used in place of the current so that positive values correspond to increases in excitatory input. Conductance ( $g$ ) was calculated as the ratio of the synaptic current ( $I$ ) and the driving force:

$$g = \frac{I}{V_m - E_{cation}} \quad (7)$$

where  $V_m$  is the membrane potential ( $-70$  mV) and  $E_{cation}$  is the cation reversal potential ( $0$  mV).

The kernel coefficients ( $\hat{\mathbf{k}}$ ) were then estimated using ridge regression:

$$\hat{\mathbf{k}} = (\mathbf{s}^\top \mathbf{s} + \lambda \mathbf{I})^{-1} \mathbf{s}^\top \mathbf{r}_t \quad (8)$$

where  $\mathbf{I}$  is the identity matrix and  $\lambda$  is the ridge parameter.

### Computational model

We created a model of the diffuse bipolar cells that provide excitatory synaptic input to parasol and smooth monostratified ganglion cells. A lattice of model bipolar cells was created with a mean spacing of 32 microns (Boycott and Wässle, 1991; Tsukamoto and Omi, 2015, 2016). The spatiotemporal filtering and output nonlinearities for the bipolar cells were determined by direct measurements (Appleby and Manookin, 2020; Manookin et al., 2018). The spatiotemporal receptive field of each bipolar cell ( $\mathbf{F}_i$ ) was generated from the outer product of the Gaussian spatial component and a biphasic temporal component and the linear response

888 of each bipolar cell ( $\mathbf{r}_i$ ) was determined by projecting  
 889 the stimulus onto its receptive field.

$$\mathbf{r}_i = \mathbf{F}_i^\top \mathbf{s} \quad (9)$$

890 Noise in the bipolar responses was simulated by  
 891 adding Poisson fluctuations to the resulting bipolar cell  
 892 responses and coupling between the cells was applied  
 893 based on our direct measurements (Manookin et al.,  
 894 2018). The response of each bipolar cell following cou-  
 895 pling was determined by adding the change due to  
 896 coupling to the response prior to coupling ( $R_0$ ; Equa-  
 897 tion 10).

$$R_i(t) = R_{0i}(t) + \left[ \sum_{j=1}^n g (R_{0i}(t) - R_{0j}(t)) \exp(-d_{i,j}/\lambda) \right] \quad (10)$$

898 where  $g$  is the coupling gain or portion of the response  
 899 shared between bipolar cells,  $\lambda$  is the coupling length  
 900 constant,  $d_{i,j}$  is the pairwise Euclidean distance be-  
 901 tween the  $i$ th and  $j$ th cells, and  $n$  is the total number  
 902 of bipolar cells in the model.

903 Responses in the model bipolar cell network were  
 904 then normalized, and output thresholding was then ap-  
 905 plied by setting values below the threshold equal to  
 906 zero, and renormalizing the outputs between 0–1. A  
 907 piecewise nonlinear function (i.e., ReLU) was then ap-  
 908 plied to the thresholded responses:

$$R(t) = \begin{cases} R(t), & \text{if } R(t) > 0 \\ 0, & \text{otherwise} \end{cases} \quad (11)$$

### 909 Mutual information calculations

910 To compare encoding of past and predictive informa-  
 911 tion, we estimated the amount of information that the  
 912 neural response at a particular time ( $r_t$ ) provided about  
 913 the stimulus at time,  $t'$  ( $\mathbf{s}_{t'}$ ), where  $t' = t + \Delta t$  using  
 914 Equation 12. The mutual information was estimated at  
 915 several different time lags ( $\Delta t$ ) relative to the peak of

the temporal filter (see (Liu et al., 2021)).

916

$$I(R_t; S_{t'}) = \sum_{s_{t'} \in S_{t'}} \sum_{r_t \in R_t} P(\mathbf{s}_{t'}, r_t) \log_2 \left[ \frac{P(\mathbf{s}_{t'}, r_t)}{P_R(r_t) P_S(\mathbf{s}_{t'})} \right] \quad (12)$$

917 where  $P_R(\mathbf{r})$  is the distribution of responses in a sin-  
 918 gle cell,  $P_S(\mathbf{s})$  is the stimulus distribution, and  $P(\mathbf{s}_{t'}, r_t)$   
 919 is the joint distribution of stimuli presented at time  $t'$   
 920 and responses  $\mathbf{r}$  observed at time  $t$ . In other words, re-  
 921 sponses were fixed in time, the stimulus was shifted for  
 922 each time bin, and the mutual information was com-  
 923 puted at each of these time shifts (Palmer et al., 2015;  
 924 Bialek, 2012). These mutual information calculations  
 925 required converting the spatial dimensions of our stim-  
 926 uli into a single value for each time bin. We did this by  
 927 first identifying the four spatial regions of the stimulus  
 928 that were centered over the receptive field. Each of the  
 929 16 possible stimulus patterns for those four regions was  
 930 assigned a value between 0–15.

## REFERENCES

- 931 Adelson, E. H. and Bergen, J. R. (1985). Spatiotemporal  
932 energy models for the perception of motion. *J. Opt.*  
933 *Soc. Am. A*, 2(2):284–299.
- 934 Appleby, T. R. and Manookin, M. B. (2019). Neural sen-  
935 sitization improves encoding fidelity in the primate  
936 retina. *Nat. Commun.*, 10(1):4017.
- 937 Appleby, T. R. and Manookin, M. B. (2020). Selectivity  
938 to approaching motion in retinal inputs to the dorsal  
939 visual pathway. *Elife*, 9.
- 940 Baccus, S. A. and Meister, M. (2002). Fast and slow  
941 contrast adaptation in retinal circuitry. *Neuron*,  
942 36(5):909–919.
- 943 Barlow, H. B. (1961). Possible principles underlying the  
944 transformation of sensory messages. volume 1, pages  
945 217–234. MIT Press, Cambridge.
- 946 Barlow, H. B., Hill, R. M., and Levick, W. R. (1964). Reti-  
947 nal ganglion cells responding selectively to direction  
948 and speed of image motion in the rabbit. *J. Physiol.*,  
949 173:377–407.
- 950 Berry, 2nd, M. J., Brivanlou, I. H., Jordan, T. A., and  
951 Meister, M. (1999). Anticipation of moving stimuli  
952 by the retina. *Nature*, 398(6725):334–338.
- 953 Bialek, W. (2012). *Biophysics: Searching for Principles*.  
954 Princeton University Press.
- 955 Bialek, W., Nemenman, I., and Tishby, N. (2001). Pre-  
956 dictability, complexity, and learning. *Neural Comput.*,  
957 13(11):2409–2463.
- 958 Billington, J., Wilkie, R. M., Field, D. T., and Wann, J. P.  
959 (2011). Neural processing of imminent collision in  
960 humans. *Proc. Biol. Sci.*, 278(1711):1476–1481.
- 961 Boycott, B. B. and Wässle, H. (1991). Morphological  
962 classification of bipolar cells of the primate retina.  
963 *Eur. J. Neurosci.*, 3(11):1069–1088.
- 964 Chacron, M. J., Doiron, B., Maler, L., Longtin, A., and  
965 Bastian, J. (2003). Non-classical receptive field medi-  
966 ates switch in a sensory neuron’s frequency tuning.  
967 *Nature*, 423(6935):77–81.
- 968 Chalk, M., Marre, O., and Tkačik, G. (2018). Toward a  
969 unified theory of efficient, predictive, and sparse cod-  
970 ing. *Proc. Natl. Acad. Sci. U. S. A.*, 115(1):186–191.
- Chichilnisky, E. J. and Kalmar, R. S. (2002). Functional  
asymmetries in ON and OFF ganglion cells of primate  
retina. *J. Neurosci.*, 22(7):2737–2747.
- Crook, J. D., Peterson, B. B., Packer, O. S., Robinson,  
F. R., Gamlin, P. D., Troy, J. B., and Dacey, D. M.  
(2008). The smooth monostratified ganglion cell: ev-  
idence for spatial diversity in the y-cell pathway to  
the lateral geniculate nucleus and superior colliculus  
in the macaque monkey. *J. Neurosci.*, 28(48):12654–  
12671.
- De Valois, R. L. and Cottaris, N. P. (1998). Inputs to  
directionally selective simple cells in macaque striate  
cortex. *Proc. Natl. Acad. Sci. U. S. A.*, 95(24):14488–  
14493.
- DeAngelis, G. C., Ohzawa, I., and Freeman, R. D.  
(1993a). Spatiotemporal organization of simple-cell  
receptive fields in the cat’s striate cortex. i. general  
characteristics and postnatal development. *J. Neuro-  
physiol.*, 69(4):1091–1117.
- DeAngelis, G. C., Ohzawa, I., and Freeman, R. D.  
(1993b). Spatiotemporal organization of simple-cell  
receptive fields in the cat’s striate cortex. II. linearity  
of temporal and spatial summation. *J. Neurophysiol.*,  
69(4):1118–1135.
- deCharms, R. C., Blake, D. T., and Merzenich, M. M.  
(1998). Optimizing sound features for cortical neu-  
rons. *Science*, 280(5368):1439–1443.
- Emerson, R. C., Bergen, J. R., and Adelson, E. H. (1992).  
Directionally selective complex cells and the compu-  
tation of motion energy in cat visual cortex. *Vision  
Res.*, 32(2):203–218.
- Escabí, M. A., Miller, L. M., Read, H. L., and Schreiner,  
C. E. (2003). Naturalistic auditory contrast improves  
spectrotemporal coding in the cat inferior colliculus.  
*J. Neurosci.*, 23(37):11489–11504.
- Fairhall, A. L., Burlingame, C. A., Narasimhan, R., Har-  
ris, R. A., Puchalla, J. L., and Berry, 2nd, M. J. (2006).  
Selectivity for multiple stimulus features in retinal  
ganglion cells. *J. Neurophysiol.*, 96(5):2724–2738.
- Fairhall, A. L., Lewen, G. D., Bialek, W., and de Ruyter  
Van Steveninck, R. R. (2001). Efficiency and ambigu-

- ity in an adaptive neural code. *Nature*, 412(6849):787–792. 1012
- Hubel, D. H. and Wiesel, T. N. (1959). Receptive fields of single neurones in the cat’s striate cortex. *J. Physiol.*, 148:574–591. 1013
- Hubel, D. H. and Wiesel, T. N. (1974). Uniformity of monkey striate cortex: a parallel relationship between field size, scatter, and magnification factor. *J. Comp. Neurol.*, 158(3):295–305. 1014
- Johnston, J. and Lagnado, L. (2015). General features of the retinal connectome determine the computation of motion anticipation. *Elife*, 4. 1015
- Kim, K. J. and Rieke, F. (2001). Temporal contrast adaptation in the input and output signals of salamander retinal ganglion cells. *J. Neurosci.*, 21(1):287–299. 1016
- Koehl, M. A., Koseff, J. R., Crimaldi, J. P., McCay, M. G., Cooper, T., Wiley, M. B., and Moore, P. A. (2001). Lobster sniffing: antennule design and hydrodynamic filtering of information in an odor plume. *Science*, 294(5548):1948–1951. 1017
- Kuo, S. P., Schwartz, G. W., and Rieke, F. (2016). Non-linear spatiotemporal integration by electrical and chemical synapses in the retina. *Neuron*, 90(2):320–332. 1018
- Latimer, K. W., Barbera, D., Sokoletsky, M., Awwad, B., Katz, Y., Nelken, I., Lampl, I., Fairhall, A. L., and Priebe, N. J. (2019). Multiple timescales account for adaptive responses across sensory cortices. *J. Neurosci.*, 39(50):10019–10033. 1019
- Latimer, K. W. and Fairhall, A. L. (2020). Capturing multiple timescales of adaptation to Second-Order statistics with generalized linear models: Gain scaling and fractional differentiation. *Front. Syst. Neurosci.*, 14:60. 1020
- Laughlin, S. (1981). A simple coding procedure enhances a neuron’s information capacity. *Z. Naturforsch. C*, 36(9-10):910–912. 1021
- Leonardo, A. and Meister, M. (2013). Nonlinear dynamics support a linear population code in a retinal target-tracking circuit. *J. Neurosci.*, 33(43):16971–16982. 1022
- Lewicki, M. S. (2002). Efficient coding of natural sounds. *Nat. Neurosci.*, 5(4):356–363. 1023
- Liu, B., Hong, A., Rieke, F., and Manookin, M. B. (2020). Predictive encoding of motion begins in the primate retina. 1024
- Liu, B., Hong, A., Rieke, F., and Manookin, M. B. (2021). Predictive encoding of motion begins in the primate retina. *Nat. Neurosci.*, 24(9):1280–1291. 1025
- Machens, C. K., Gollisch, T., Kolesnikova, O., and Herz, A. V. M. (2005). Testing the efficiency of sensory coding with optimal stimulus ensembles. *Neuron*, 47(3):447–456. 1026
- Machens, C. K., Stemmler, M. B., Prinz, P., Krahe, R., Ronacher, B., and Herz, A. V. (2001). Representation of acoustic communication signals by insect auditory receptor neurons. *J. Neurosci.*, 21(9):3215–3227. 1027
- Manookin, M. B., Patterson, S. S., and Linehan, C. M. (2018). Neural mechanisms mediating motion sensitivity in parasol ganglion cells of the primate retina. *Neuron*, 97(6):1327–1340.e4. 1028
- Manookin, M. B., Puller, C., Rieke, F., Neitz, J., and Neitz, M. (2015). Distinctive receptive field and physiological properties of a wide-field amacrine cell in the macaque monkey retina. *J. Neurophysiol.*, 114(3):1606–1616. 1029
- Mease, R. A., Famulare, M., Gjorgjieva, J., Moody, W. J., and Fairhall, A. L. (2013). Emergence of adaptive computation by single neurons in the developing cortex. *J. Neurosci.*, 33(30):12154–12170. 1030
- Movshon, J. A. and Newsome, W. T. (1996). Visual response properties of striate cortical neurons projecting to area MT in macaque monkeys. *J. Neurosci.*, 16(23):7733–7741. 1031
- Olshausen, B. A. and Field, D. J. (1996). Emergence of simple-cell receptive field properties by learning a sparse code for natural images. *Nature*, 381(6583):607–609. 1032
- Palmer, S. E., Marre, O., Berry, 2nd, M. J., and Bialek, W. (2015). Predictive information in a sensory population. *Proc. Natl. Acad. Sci. U. S. A.*, 112(22):6908–6913. 1033
- Paninski, L. (2003). Convergence properties of three spike-triggered analysis techniques. *Network*, 1034

- 1094 14(3):437–464.
- 1095 Paninski, L. (2004). Maximum likelihood estimation of  
1096 cascade point-process neural encoding models. *Net-*  
1097 *work*, 15(4):243–262.
- 1098 Pillow, J. W., Shlens, J., Paninski, L., Sher, A., Litke,  
1099 A. M., Chichilnisky, E. J., and Simoncelli, E. P.  
1100 (2008). Spatio-temporal correlations and visual sig-  
1101 nalling in a complete neuronal population. *Nature*,  
1102 454(7207):995–999.
- 1103 Pillow, J. W. and Simoncelli, E. P. (2006). Dimensionality  
1104 reduction in neural models: an information-theoretic  
1105 generalization of spike-triggered average and covari-  
1106 ance analysis. *J. Vis.*, 6(4):414–428.
- 1107 Reid, R. C., Soodak, R. E., and Shapley, R. M. (1987).  
1108 Linear mechanisms of directional selectivity in simple  
1109 cells of cat striate cortex. *Proc. Natl. Acad. Sci. U. S. A.*,  
1110 84(23):8740–8744.
- 1111 Reid, R. C., Soodak, R. E., and Shapley, R. M. (1991). Di-  
1112 rectional selectivity and spatiotemporal structure of  
1113 receptive fields of simple cells in cat striate cortex. *J.*  
1114 *Neurophysiol.*, 66(2):505–529.
- 1115 Reinagel, P. (2001). How do visual neurons respond in  
1116 the real world? *Curr. Opin. Neurobiol.*, 11(4):437–442.
- 1117 Rhoades, C. E., Shah, N. P., Manookin, M. B., Brack-  
1118 bill, N., Kling, A., Goetz, G., Sher, A., Litke, A. M.,  
1119 and Chichilnisky, E. J. (2019). Unusual physiologi-  
1120 cal properties of smooth monostratified ganglion cell  
1121 types in primate retina. *Neuron*.
- 1122 Rieke, F., Bodnar, D. A., and Bialek, W. (1995). Natural-  
1123 istic stimuli increase the rate and efficiency of infor-  
1124 mation transmission by primary auditory afferents.  
1125 *Proc. Biol. Sci.*, 262(1365):259–265.
- 1126 Rodieck, R. W. and Watanabe, M. (1993). Survey of the  
1127 morphology of macaque retinal ganglion cells that  
1128 project to the pretectum, superior colliculus, and par-  
1129 vicellular laminae of the lateral geniculate nucleus. *J.*  
1130 *Comp. Neurol.*, 338(2):289–303.
- 1131 Rust, N. C., Schwartz, O., Movshon, J. A., and Si-  
1132 moncelli, E. P. (2005). Spatiotemporal elements of  
1133 macaque v1 receptive fields. *Neuron*, 46(6):945–956.
- 1134 Sachdeva, V., Mora, T., Walczak, A. M., and Palmer, S. E.  
(2021). Optimal prediction with resource constraints  
using the information bottleneck. *PLoS Comput. Biol.*,  
17(3):e1008743.
- Salisbury, J. M. and Palmer, S. E. (2016). Optimal pre-  
diction in the retina and natural motion statistics. *J.*  
*Stat. Phys.*, 162(5):1309–1323.
- Schiller, P. H., Logothetis, N. K., and Charles, E. R.  
(1990). Functions of the colour-opponent and  
broad-band channels of the visual system. *Nature*,  
343(6253):68–70.
- Schwartz, G., Taylor, S., Fisher, C., Harris, R., and Berry,  
M. J. (2007). Synchronized firing among retinal gan-  
glion cells signals motion reversal. *Neuron*, 55(6):958–  
969.
- Sharpee, T., Rust, N. C., and Bialek, W. (2004). Ana-  
lyzing neural responses to natural signals: maximally  
informative dimensions. *Neural Comput.*, 16(2):223–  
250.
- Singer, Y., Teramoto, Y., Willmore, B. D., Schnupp, J. W.,  
King, A. J., and Harper, N. S. (2018). Sensory cortex  
is optimized for prediction of future input. *Elife*, 7.
- Smirnakis, S. M., Berry, M. J., Warland, D. K., Bialek, W.,  
and Meister, M. (1997). Adaptation of retinal pro-  
cessing to image contrast and spatial scale. *Nature*,  
386(6620):69–73.
- Tishby, N., Pereira, F. C., and Bialek, W. (1999). The in-  
formation bottleneck method. In Hajek, B. and Sreeni-  
vas, R. S., editors, *Proceedings of the 37th Annual Aller-*  
*ton Conference on Communication, Control and Comput-*  
*ing*, pages 368–377. University of Illinois.
- Truccolo, W., Eden, U. T., Fellows, M. R., Donoghue, J. P.,  
and Brown, E. N. (2005). A point process framework  
for relating neural spiking activity to spiking history,  
neural ensemble, and extrinsic covariate effects. *J.*  
*Neurophysiol.*, 93(2):1074–1089.
- Tsukamoto, Y. and Omi, N. (2015). OFF bipolar cells  
in macaque retina: type-specific connectivity in the  
outer and inner synaptic layers. *Front. Neuroanat.*,  
9:122.
- Tsukamoto, Y. and Omi, N. (2016). ON bipolar cells  
in macaque retina: Type-Specific synaptic connectiv-



- ity with special reference to OFF counterparts. *Front. Neuroanat.*, 10:104.
- Turner, M. H. and Rieke, F. (2016). Synaptic rectification controls nonlinear spatial integration of natural visual inputs. *Neuron*, 90(6):1257–1271.
- Turner, M. H., Schwartz, G. W., and Rieke, F. (2018). Receptive field center-surround interactions mediate context-dependent spatial contrast encoding in the retina. *Elife*, 7.
- Vergassola, M., Villermaux, E., and Shraiman, B. I. (2007). ‘infotaxis’ as a strategy for searching without gradients. *Nature*, 445(7126):406–409.
- Vickers, N. J. (2000). Mechanisms of animal navigation in odor plumes. *Biol. Bull.*, 198(2):203–212.
- Vinje, W. E. and Gallant, J. L. (2002). Natural stimulation of the nonclassical receptive field increases information transmission efficiency in V1. *J. Neurosci.*, 22(7):2904–2915.
- Weber, A. I. and Pillow, J. W. (2017). Capturing the dynamical repertoire of single neurons with generalized linear models. *Neural Comput.*, 29(12):3260–3289.
- Williamson, R. S., Sahani, M., and Pillow, J. W. (2015). The equivalence of information-theoretic and likelihood-based methods for neural dimensionality reduction. *PLoS Comput. Biol.*, 11(4):e1004141.
- Zelano, C., Mohanty, A., and Gottfried, J. A. (2011). Olfactory predictive codes and stimulus templates in piriform cortex. *Neuron*, 72(1):178–187.
- Zhang, Y., Kim, I.-J., Sanes, J. R., and Meister, M. (2012). The most numerous ganglion cell type of the mouse retina is a selective feature detector. *Proc. Natl. Acad. Sci. U. S. A.*, 109(36):E2391–8.

SUPPLEMENTARY INFORMATION

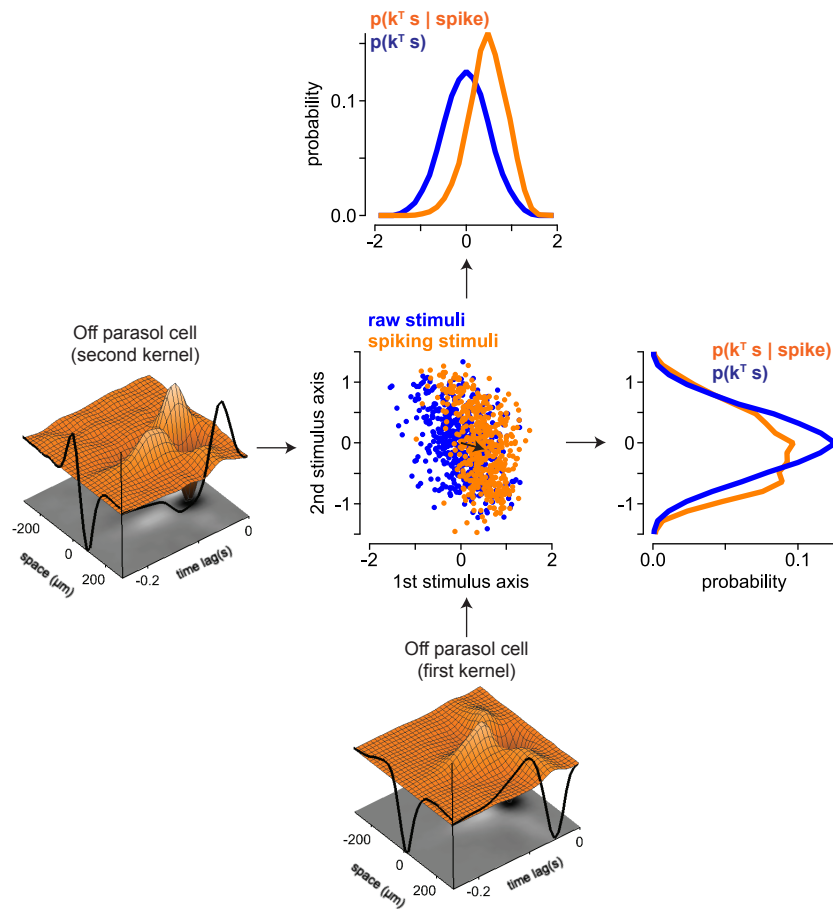

**Figure S1.** Example of the maximally informative dimensions technique in an Off parasol ganglion cells. *Bottom left*, A two-dimensional stimulus space depicting the raw stimuli (*blue*) and the stimuli that elicited spiking in an Off parasol ganglion cell (*orange*). The black arrow indicates the centroid of the spike-triggered stimuli. The probability distributions for the raw stimuli and the spiking stimuli were computed by projecting the stimuli along the first or second stimulus axis (*top left* and *bottom center*, respectively).

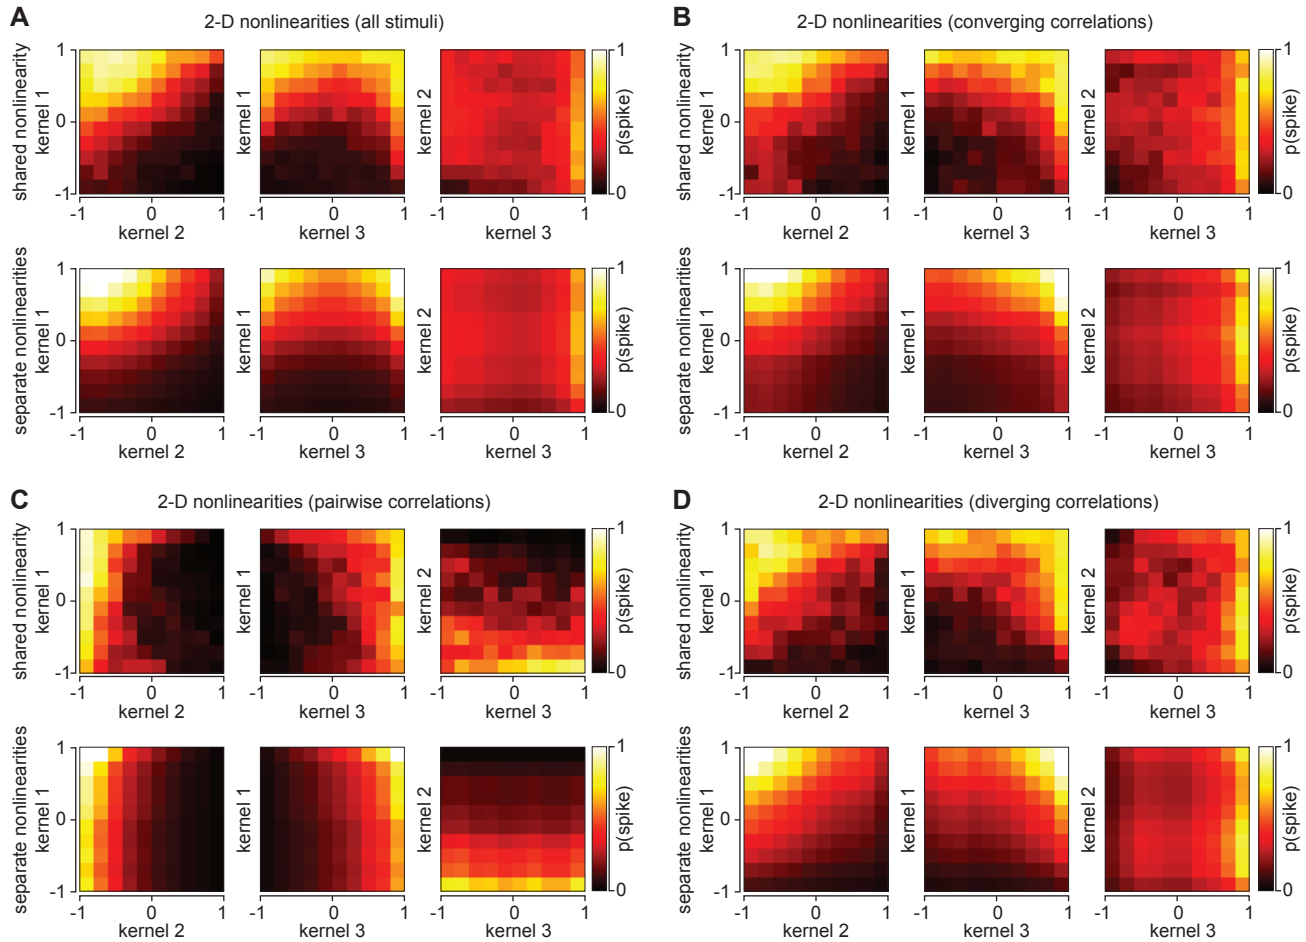

**Figure S2.** Kernel nonlinearities vary for different classes of spatiotemporal correlation. (A) Two-dimensional nonlinearities illustrating the interactions between the individual kernels for an On smooth monostratified cell. The  $x$  and  $y$  axes represent the normalized projection of the stimulus onto the individual kernels. The color intensities represent the spiking probability of the cell for a particular location on the interaction map. Two-dimensional nonlinearities are shown for all of the stimulus classes including uncorrelated noise. (B-D) Two-dimensional nonlinearities for converging correlations, pairwise correlations, and diverging correlations in the same cell as (A). The shared and separate nonlinearities differed substantially, indicating that a model in which the kernel outputs passed through separate nonlinearities prior to being combined did not adequately describe the kernel interactions. Further, the shared nonlinearities varied slightly with stimulus class, suggesting that the contribution of the kernels depended on the stimulus correlations.

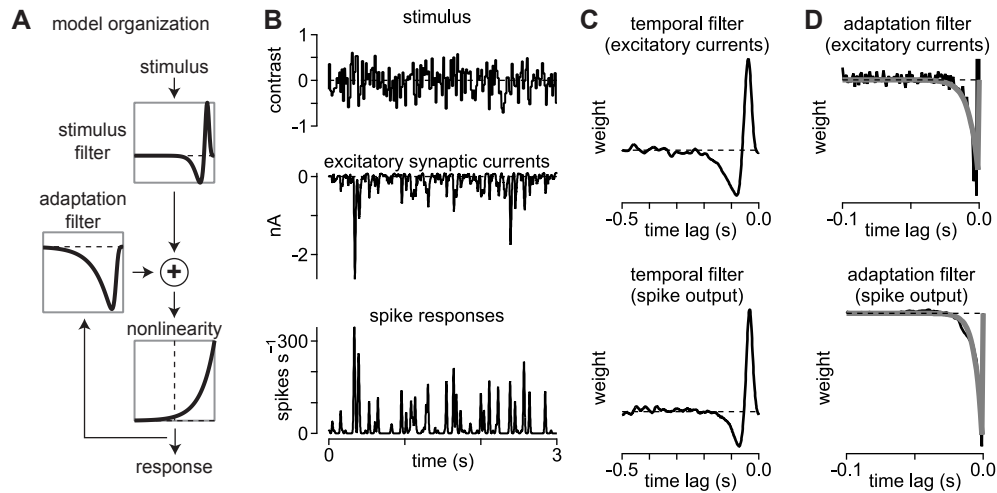

**Figure S3.** Generalized linear model organization. (A) Gain control in smooth monostratified ganglion cells was estimated using a generalized linear model (GLM). The input stimulus was filtered by a temporal kernel and passed through a nonlinearity. Based on the output history of the model at this stage, an adaptation filter provides feedback to signals prior to the output nonlinearity. (B) Model parameters were estimated by presenting a spatially uniform spot over the receptive field. Spot contrast was drawn randomly from a Gaussian distribution on each time step (*top*). Excitatory synaptic currents were measured to estimate the filtering and adaptation properties of diffuse bipolar cells (*center*) and spike output was also measured in the same On smooth monostratified ganglion cell (*bottom*). (C) Temporal kernels estimated from the excitatory synaptic currents and spike responses in (B). (D) Adaptation filters estimated from the excitatory synaptic currents and spike responses in (B).

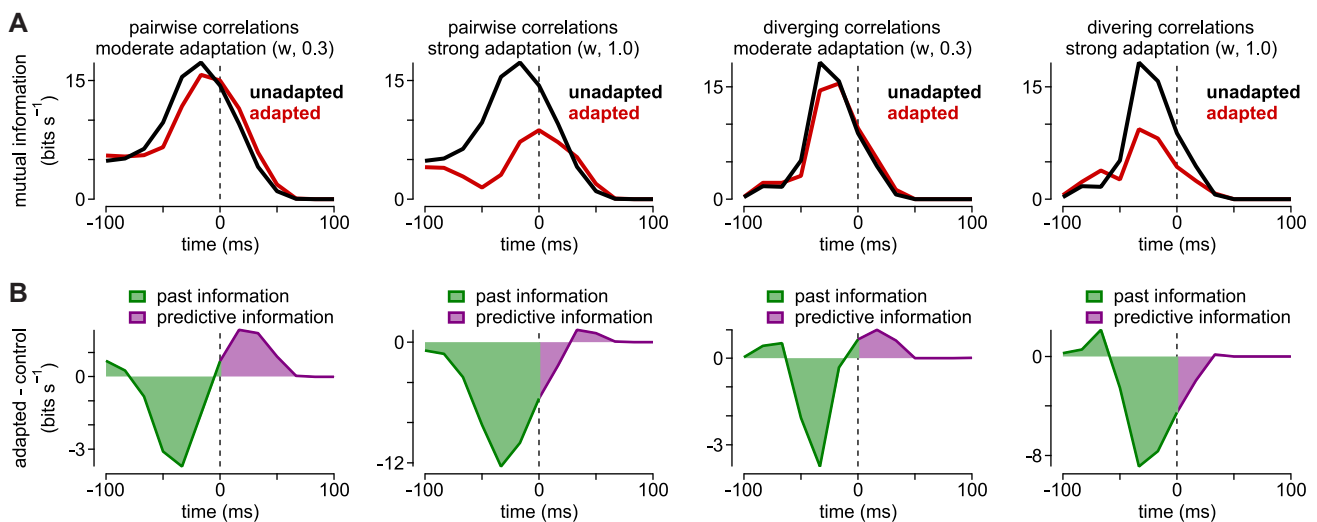

**Figure S4.** Moderate adaptation improves predictive encoding. (A) Mutual information (*y*-axis) encoded as a function of time lag (*x*-axis) for pairwise and diverging correlations. Curves are shown comparing the model lacking adaptation to models with moderate or high levels of adaptation. (B) Difference curves in which the past (*green*) and predictive information (*purple*) are compared for the adapted versus unadapted curves in (A). Moderate adaptation increased the encoding of predictive information while strong adaptation decreased this encoding.
